# Supplementary material
Source: PubMed Central journal article supplement (PMC4286167)
Supplement: pr500818d_si_001.pdf [file pr500818d_si_001.pdf]

**Supplemental Table 1.** All 601 Measured Human Colostral Whey Proteins from Women with and without Gestational Diabetes Mellitus

Accession is the Uniprot database identifier (<http://www.uniprot.org/>). Molecular weight, MW, in kilodaltons, kDa. Normalized total spectra values are reported as the mean  $\pm$  standard deviation of normalized total spectra. Rankings are based on the absolute values of the orthogonal signal corrected partial least squares discriminant analysis model loadings on the latent variable 1.

|         |                                                                  |        |         | Normalized Total Spectra |              | Total Spectra |         | % Sequence Coverage |         | Number of Unique Peptides |         |  |
|---------|------------------------------------------------------------------|--------|---------|--------------------------|--------------|---------------|---------|---------------------|---------|---------------------------|---------|--|
| Protein | Accession                                                        | MW     | non-GDM | GDM                      | Median       | Range         | Median  | Range               | Median  | Range                     | Rank    |  |
| 1       | 14-3-3 protein beta/alpha                                        | P31946 | 28 kDa  | 3.22 ± 1.7               | 1.24 ± 1.3   | 3             | (0, 9)  | 7                   | (0, 25) | 0                         | (0, 3)  |  |
| 2       | 14-3-3 protein epsilon                                           | P62258 | 29 kDa  | 0.843 ± 0.98             | 0.795 ± 1.3  | 1             | (0, 5)  | 4                   | (0, 17) | 0                         | (0, 3)  |  |
| 3       | 14-3-3 protein gamma                                             | P61981 | 28 kDa  | 0.245 ± 0.85             | 0 ± 0        | 2             | (0, 5)  | 4                   | (0, 23) | 0                         | (0, 2)  |  |
| 4       | 14-3-3 protein sigma                                             | P31947 | 28 kDa  | 0.599 ± 0.92             | 0.726 ± 1.5  | 2             | (0, 6)  | 5                   | (0, 17) | 0                         | (0, 2)  |  |
| 5       | 14-3-3 protein theta                                             | P27348 | 28 kDa  | 0.593 ± 1.5              | 0 ± 0        | 2             | (0, 7)  | 7                   | (0, 25) | 0                         | (0, 2)  |  |
| 6       | 1-phosphatidylinositol 4,5-bisphosphate phosphodiesterase eta-1  | Q4KWH8 | 189 kDa | 0.481 ± 0.66             | 1.18 ± 0.91  | 0             | (0, 3)  | 0                   | (0, 1)  | 0                         | (0, 2)  |  |
| 7       | 40S ribosomal protein S12                                        | P25398 | 15 kDa  | 0.248 ± 0.33             | 0 ± 0        | 0             | (0, 3)  | 0                   | (0, 14) | 0                         | (0, 2)  |  |
| 8       | 40S ribosomal protein S28                                        | P62857 | 8 kDa   | 0.511 ± 0.42             | 0.2 ± 0.49   | 0             | (0, 2)  | 0                   | (0, 30) | 0                         | (0, 2)  |  |
| 9       | 45 kDa calcium-binding protein                                   | Q9BRK5 | 42 kDa  | 10.3 ± 4.7               | 5.17 ± 5.7   | 7             | (0, 20) | 18                  | (0, 42) | 5                         | (0, 11) |  |
| 10      | 60S acidic ribosomal protein P2                                  | P05387 | 12 kDa  | 0.41 ± 0.57              | 0.104 ± 0.25 | 0             | (0, 2)  | 0                   | (0, 39) | 0                         | (0, 2)  |  |
| 11      | 78 kDa glucose-regulated protein                                 | P11021 | 72 kDa  | 3.24 ± 1.8               | 1.38 ± 2.6   | 2             | (0, 10) | 4                   | (0, 13) | 1                         | (0, 6)  |  |
| 12      | A disintegrin and metalloproteinase with thrombospondin motifs 1 | Q9UHI8 | 105 kDa | 0.224 ± 0.57             | 0.35 ± 0.61  | 0             | (0, 3)  | 0                   | (0, 3)  | 0                         | (0, 2)  |  |
| 13      | A disintegrin and metalloproteinase with thrombospondin motifs 9 | Q9P2N4 | 216 kDa | 0.195 ± 0.29             | 0.279 ± 0.5  | 0             | (0, 2)  | 0                   | (0, 2)  | 0                         | (0, 2)  |  |
| 14      | Acid sphingomyelinase-like phosphodiesterase 3b                  | Q92485 | 51 kDa  | 0.0927 ± 0.22            | 0.566 ± 0.63 | 0             | (0, 3)  | 0                   | (0, 8)  | 0                         | (0, 3)  |  |
| 15      | Actin, alpha cardiac muscle 1                                    | P68032 | 42 kDa  | 13.9 ± 6.3               | 9.92 ± 8.1   | 13            | (3, 38) | 24                  | (6, 30) | 0                         | (0, 0)  |  |
| 16      | Actin, aortic smooth muscle                                      | P62736 | 42 kDa  | 12.5 ± 6                 | 6.36 ± 6.6   | 12            | (3, 34) | 23                  | (6, 29) | 0                         | (0, 0)  |  |

|         |                                      |        | Normalized Total Spectra |               | Total Spectra |       | % Sequence Coverage |       | Number of Unique Peptides |       |          |   |
|---------|--------------------------------------|--------|--------------------------|---------------|---------------|-------|---------------------|-------|---------------------------|-------|----------|---|
| Protein | Accession                            | MW     | non-GDM                  | GDM           | Median        | Range | Median              | Range | Median                    | Range | Rank     |   |
| 17      | Actin, cytoplasmic 1                 | P60709 | 42 kDa                   | 18.5 ± 8.4    | 14.1 ± 7.1    | 16    | (3, 56)             | 30    | (9, 60)                   | 0     | (0, 1)   |   |
| 18      | Actin, cytoplasmic 2                 | P63261 | 42 kDa                   | 18.8 ± 8.7    | 13.9 ± 7      | 16    | (3, 57)             | 31    | (9, 60)                   | 0     | (0, 1)   |   |
| 19      | Acyl-CoA-binding protein             | P07108 | 10 kDa                   | 0.0812 ± 0.19 | 0.165 ± 0.27  | 0     | (0, 4)              | 0     | (0, 63)                   | 0     | (0, 4)   |   |
| 20      | Afamin                               | P43652 | 69 kDa                   | 0.373 ± 0.58  | 0.519 ± 0.8   | 0     | (0, 3)              | 0     | (0, 4)                    | 0     | (0, 2)   |   |
| 21      | Aggrin                               | O00468 | 217 kDa                  | 0.163 ± 0.39  | 2 ± 2.3       | 0     | (0, 7)              | 0     | (0, 3)                    | 0     | (0, 6)   |   |
| 22      | A-kinase anchor protein 9            | Q99996 | 454 kDa                  | 0.509 ± 0.37  | 0.92 ± 0.69   | 1     | (0, 2)              | 0     | (0, 1)                    | 0     | (0, 1)   |   |
| 23      | Allograft inflammatory factor 1-like | Q9BQI0 | 17 kDa                   | 0.251 ± 0.59  | 0.072 ± 0.18  | 0     | (0, 3)              | 0     | (0, 17)                   | 0     | (0, 3)   |   |
| 24      | Alpha-1-acid glycoprotein 1          | P02763 | 24 kDa                   | 23.3 ± 6.3    | 20.2 ± 7.2    | 21.5  | (7, 51)             | 37    | (12, 45)                  | 6     | (2, 8)   |   |
| 25      | Alpha-1-acid glycoprotein 2          | P19652 | 24 kDa                   | 9.31 ± 2.9    | 11.7 ± 5.7    | 9.5   | (1, 28)             | 26    | (4, 41)                   | 3     | (0, 5)   |   |
| 26      | Alpha-1-antichymotrypsin             | P01011 | 48 kDa                   | 61.3 ± 34     | 89.2 ± 49     | 58    | (14, 166)           | 42    | (22, 53)                  | 18    | (8, 28)  |   |
| 27      | Alpha-1-antitrypsin                  | P01009 | 47 kDa                   | 80.8 ± 20     | 99.8 ± 48     | 79.5  | (36, 213)           | 56    | (35, 66)                  | 26.5  | (13, 41) |   |
| 28      | Alpha-1B-glycoprotein                | P04217 | 54 kDa                   | 10.4 ± 3.7    | 7.88 ± 3.8    | 8.5   | (3, 20)             | 19    | (2, 35)                   | 7     | (3, 12)  |   |
| 29      | Alpha-2-antiplasmin                  | P08697 | 55 kDa                   | 1.16 ± 0.78   | 0.515 ± 0.66  | 1     | (0, 4)              | 3     | (0, 7)                    | 1     | (0, 2)   |   |
| 30      | Alpha-2-HS-glycoprotein              | P02765 | 39 kDa                   | 20.1 ± 8.6    | 9.36 ± 4.4    | 17    | (3, 33)             | 27    | (0, 51)                   | 8     | (3, 12)  | 8 |
| 31      | Alpha-2-macroglobulin                | P01023 | 163 kDa                  | 0.16 ± 0.45   | 0 ± 0         | 0     | (0, 4)              | 0     | (0, 4)                    | 0     | (0, 4)   |   |
| 32      | Alpha-actinin-1                      | P12814 | 103 kDa                  | 0.069 ± 0.24  | 0.79 ± 1.5    | 0     | (0, 5)              | 0     | (0, 4)                    | 0     | (0, 0)   |   |

|         |                                             |        | Normalized Total Spectra |               | Total Spectra |       | % Sequence Coverage |       | Number of Unique Peptides |       |          |    |
|---------|---------------------------------------------|--------|--------------------------|---------------|---------------|-------|---------------------|-------|---------------------------|-------|----------|----|
| Protein | Accession                                   | MW     | non-GDM                  | GDM           | Median        | Range | Median              | Range | Median                    | Range | Rank     |    |
| 33      | Alpha-actinin-4                             | O43707 | 105 kDa                  | 0.192 ± 0.3   | 0.857 ± 1.6   | 0     | (0, 6)              | 0     | (0, 5)                    | 0     | (0, 1)   |    |
| 34      | Alpha-amylase 1                             | P04745 | 58 kDa                   | 2.97 ± 2.7    | 1.11 ± 1.9    | 2     | (0, 16)             | 4     | (0, 28)                   | 2     | (0, 12)  |    |
| 35      | Alpha-enolase                               | P06733 | 47 kDa                   | 5.88 ± 3.6    | 1.94 ± 1.8    | 4     | (0, 15)             | 9     | (0, 33)                   | 3.5   | (0, 11)  |    |
| 36      | Alpha-lactalbumin                           | P00709 | 16 kDa                   | 910 ± 220     | 725 ± 220     | 839.5 | (479, 1565)         | 83    | (66, 87)                  | 44    | (27, 56) |    |
| 37      | Alpha-S1-casein                             | P47710 | 22 kDa                   | 620 ± 220     | 399 ± 320     | 554   | (118, 961)          | 88    | (74, 91)                  | 57.5  | (26, 72) |    |
| 38      | Aminopeptidase N                            | P15144 | 110 kDa                  | 0.0627 ± 0.22 | 0.556 ± 1.1   | 0     | (0, 5)              | 0     | (0, 4)                    | 0     | (0, 4)   |    |
| 39      | Amyloid beta A4 protein                     | P05067 | 87 kDa                   | 13.3 ± 4.2    | 8.2 ± 4.4     | 11    | (3, 27)             | 11    | (3, 22)                   | 7.5   | (2, 16)  | 10 |
| 40      | Amyloid-like protein 2                      | Q06481 | 87 kDa                   | 0.45 ± 0.52   | 0 ± 0         | 1     | (0, 2)              | 1     | (0, 4)                    | 0     | (0, 1)   |    |
| 41      | Angiopietin-related protein 4               | Q9BY76 | 45 kDa                   | 3.66 ± 5.8    | 1.87 ± 2.9    | 1.5   | (0, 29)             | 3     | (0, 33)                   | 1     | (0, 13)  |    |
| 42      | Angiotensinogen                             | P01019 | 53 kDa                   | 2.26 ± 1.7    | 1.31 ± 2.4    | 1     | (0, 8)              | 2     | (0, 20)                   | 1     | (0, 7)   |    |
| 43      | Ankyrin repeat domain-containing protein 32 | Q9BQI6 | 121 kDa                  | 0.913 ± 1.8   | 0.128 ± 0.2   | 0     | (0, 5)              | 0     | (0, 1)                    | 0     | (0, 2)   |    |
| 44      | Antileukoproteinase                         | P03973 | 14 kDa                   | 0 ± 0         | 0.721 ± 1.2   | 0     | (0, 4)              | 0     | (0, 18)                   | 0     | (0, 2)   |    |
| 45      | Antithrombin-III                            | P01008 | 53 kDa                   | 2.87 ± 1      | 3.38 ± 4.2    | 2     | (0, 13)             | 4     | (0, 23)                   | 2     | (0, 10)  |    |
| 46      | Apolipoprotein A-I                          | P02647 | 31 kDa                   | 38.2 ± 13     | 16.8 ± 14     | 32.5  | (0, 88)             | 57    | (0, 70)                   | 14.5  | (0, 21)  | 1  |
| 47      | Apolipoprotein A-II                         | P02652 | 11 kDa                   | 3.11 ± 2      | 1.6 ± 1.9     | 2     | (0, 11)             | 15    | (0, 41)                   | 2     | (0, 4)   |    |
| 48      | Apolipoprotein A-IV                         | P06727 | 45 kDa                   | 2.52 ± 3.4    | 0.482 ± 0.71  | 1     | (0, 13)             | 0     | (0, 27)                   | 1     | (0, 10)  |    |

|         |                                                                      |        | Normalized Total Spectra |               | Total Spectra |        | % Sequence Coverage |       | Number of Unique Peptides |       |           |    |
|---------|----------------------------------------------------------------------|--------|--------------------------|---------------|---------------|--------|---------------------|-------|---------------------------|-------|-----------|----|
| Protein | Accession                                                            | MW     | non-GDM                  | GDM           | Median        | Range  | Median              | Range | Median                    | Range | Rank      |    |
| 49      | Apolipoprotein B-100                                                 | P04114 | 516 kDa                  | 1.07 ± 2.8    | 0.29 ± 0.71   | 0      | (0, 15)             | 0     | (0, 2)                    | 0     | (0, 9)    |    |
| 50      | Apolipoprotein D                                                     | P05090 | 21 kDa                   | 17.1 ± 12     | 48.1 ± 20     | 25.5   | (0, 65)             | 38    | (0, 42)                   | 7.5   | (0, 9)    | 17 |
| 51      | Apolipoprotein E                                                     | P02649 | 36 kDa                   | 9.81 ± 5.3    | 3.21 ± 3      | 9      | (0, 28)             | 27    | (0, 56)                   | 7.5   | (0, 16)   | 7  |
| 52      | Attractin                                                            | O75882 | 159 kDa                  | 0.064 ± 0.22  | 1.3 ± 1.8     | 0      | (0, 7)              | 0     | (0, 6)                    | 0     | (0, 7)    |    |
| 53      | Azurocidin                                                           | P20160 | 27 kDa                   | 0.199 ± 0.46  | 0.337 ± 0.83  | 0      | (0, 3)              | 0     | (0, 11)                   | 0     | (0, 3)    |    |
| 54      | Basement membrane-specific heparan sulfate proteoglycan core protein | P98160 | 469 kDa                  | 0.303 ± 0.58  | 0.682 ± 1.3   | 0      | (0, 5)              | 0     | (0, 1)                    | 0     | (0, 4)    |    |
| 55      | BEN domain-containing protein 3                                      | Q5T5X7 | 94 kDa                   | 0.89 ± 1.2    | 0.637 ± 0.71  | 0      | (0, 3)              | 0     | (0, 3)                    | 0     | (0, 2)    |    |
| 56      | Beta-1,4-galactosyltransferase 1                                     | P15291 | 44 kDa                   | 29.7 ± 13     | 16.5 ± 7.9    | 23     | (7, 69)             | 35    | (10, 52)                  | 9.5   | (3, 14)   |    |
| 57      | Beta-2-glycoprotein 1                                                | P02749 | 38 kDa                   | 6.02 ± 2.4    | 4.48 ± 2.1    | 5.5    | (1, 11)             | 22    | (3, 39)                   | 5     | (1, 8)    |    |
| 58      | Beta-2-microglobulin                                                 | P61769 | 14 kDa                   | 43.7 ± 13     | 25.3 ± 11     | 35.5   | (14, 85)            | 56    | (48, 66)                  | 12    | (6, 16)   |    |
| 59      | Beta-actin-like protein 2                                            | Q562R1 | 42 kDa                   | 5.3 ± 2.8     | 4.05 ± 3.2    | 5      | (0, 13)             | 11    | (0, 17)                   | 0     | (0, 0)    |    |
| 60      | Beta-casein                                                          | P05814 | 25 kDa                   | 1440 ± 620    | 617 ± 610     | 1229.5 | (73, 1985)          | 88    | (73, 92)                  | 96    | (20, 137) |    |
| 61      | Bile salt-activated lipase                                           | P19835 | 79 kDa                   | 86.8 ± 41     | 43.1 ± 39     | 68.5   | (8, 204)            | 34    | (7, 43)                   | 26    | (6, 45)   |    |
| 62      | Biotinidase                                                          | P43251 | 61 kDa                   | 0.164 ± 0.31  | 0.196 ± 0.33  | 0      | (0, 2)              | 0     | (0, 5)                    | 0     | (0, 2)    |    |
| 63      | Brain-specific angiogenesis inhibitor 1                              | O14514 | 174 kDa                  | 0.199 ± 0.58  | 0.325 ± 0.59  | 0      | (0, 4)              | 0     | (0, 1)                    | 0     | (0, 2)    |    |
| 64      | BRCA1-associated RING domain protein 1                               | Q99728 | 87 kDa                   | 0.0353 ± 0.12 | 0.134 ± 0.33  | 0      | (0, 2)              | 0     | (0, 2)                    | 0     | (0, 2)    |    |

|         |                                                       |        |         | Normalized Total Spectra |              | Total Spectra |         | % Sequence Coverage |         | Number of Unique Peptides |         |    |
|---------|-------------------------------------------------------|--------|---------|--------------------------|--------------|---------------|---------|---------------------|---------|---------------------------|---------|----|
| Protein | Accession                                             | MW     | non-GDM | GDM                      | Median       | Range         | Median  | Range               | Median  | Range                     | Rank    |    |
| 65      | Butyrophilin subfamily 1 member A1                    | Q13410 | 59 kDa  | 53 ± 18                  | 32.9 ± 28    | 50.5          | (4, 67) | 28                  | (3, 39) | 16.5                      | (4, 21) |    |
| 66      | C4b-binding protein alpha chain                       | P04003 | 67 kDa  | 3.18 ± 4.1               | 8.66 ± 9.9   | 3             | (0, 28) | 5                   | (0, 31) | 2                         | (0, 16) |    |
| 67      | C4b-binding protein beta chain                        | P20851 | 28 kDa  | 0.537 ± 0.81             | 0.904 ± 1.3  | 0             | (0, 5)  | 0                   | (0, 18) | 0                         | (0, 4)  |    |
| 68      | Calcium and integrin-binding protein 1                | Q99828 | 22 kDa  | 2.29 ± 1.3               | 1.77 ± 0.81  | 2             | (0, 6)  | 8                   | (0, 27) | 1                         | (0, 5)  |    |
| 69      | Calmodulin                                            | P62158 | 17 kDa  | 8.47 ± 5.5               | 4.65 ± 2.2   | 7             | (0, 17) | 32                  | (0, 43) | 3                         | (0, 5)  |    |
| 70      | Calmodulin-like protein 5                             | Q9NZT1 | 16 kDa  | 0.312 ± 0.86             | 0.662 ± 0.98 | 0             | (0, 3)  | 0                   | (0, 15) | 0                         | (0, 2)  |    |
| 71      | Calreticulin                                          | P27797 | 48 kDa  | 2.51 ± 2.4               | 1.15 ± 1.4   | 2             | (0, 9)  | 4                   | (0, 24) | 2                         | (0, 7)  | 23 |
| 72      | Calumenin                                             | O43852 | 37 kDa  | 1.78 ± 2.2               | 1.84 ± 2.2   | 1             | (0, 11) | 3                   | (0, 22) | 1                         | (0, 7)  |    |
| 73      | Canalicular multispecific organic anion transporter 1 | Q92887 | 174 kDa | 0.218 ± 0.28             | 0.429 ± 0.4  | 0             | (0, 2)  | 0                   | (0, 1)  | 0                         | (0, 1)  |    |
| 74      | Carbonic anhydrase 6                                  | P23280 | 35 kDa  | 17.4 ± 6.7               | 11.6 ± 6.2   | 14            | (2, 31) | 25                  | (6, 43) | 6                         | (2, 9)  |    |
| 75      | Cathelicidin antimicrobial peptide                    | P49913 | 19 kDa  | 0.064 ± 0.22             | 0.622 ± 0.71 | 0             | (0, 2)  | 0                   | (0, 14) | 0                         | (0, 2)  |    |
| 76      | Cathepsin B                                           | P07858 | 38 kDa  | 1.75 ± 1.4               | 1.98 ± 1.5   | 1.5           | (0, 6)  | 4                   | (0, 15) | 1.5                       | (0, 5)  |    |
| 77      | Cathepsin D                                           | P07339 | 45 kDa  | 1.7 ± 2.8                | 2.69 ± 2.4   | 0.5           | (0, 12) | 1                   | (0, 25) | 0.5                       | (0, 8)  |    |
| 78      | Cathepsin G                                           | P08311 | 29 kDa  | 0.171 ± 0.48             | 0.128 ± 0.2  | 0             | (0, 4)  | 0                   | (0, 14) | 0                         | (0, 3)  |    |
| 79      | Cathepsin S                                           | P25774 | 37 kDa  | 0.221 ± 0.53             | 0.341 ± 0.65 | 0             | (0, 3)  | 0                   | (0, 10) | 0                         | (0, 3)  |    |
| 80      | C-C motif chemokine 28                                | Q9NRJ3 | 14 kDa  | 0.636 ± 0.87             | 0.269 ± 0.49 | 0             | (0, 4)  | 0                   | (0, 23) | 0                         | (0, 2)  |    |

|         |                                                     |        |         | Normalized Total Spectra |               | Total Spectra |         | % Sequence Coverage |          | Number of Unique Peptides |         |    |
|---------|-----------------------------------------------------|--------|---------|--------------------------|---------------|---------------|---------|---------------------|----------|---------------------------|---------|----|
| Protein | Accession                                           | MW     | non-GDM | GDM                      | Median        | Range         | Median  | Range               | Median   | Range                     | Rank    |    |
| 81      | CCR4-NOT transcription complex subunit 1            | A5YKK6 | 267 kDa | 0 ± 0                    | 0.22 ± 0.54   | 0             | (0, 2)  | 0                   | (0, 1)   | 0                         | (0, 2)  |    |
| 82      | CD59 glycoprotein                                   | P13987 | 14 kDa  | 5.5 ± 1.2                | 5.92 ± 1      | 6             | (0, 9)  | 29                  | (0, 36)  | 3                         | (0, 6)  |    |
| 83      | CD63 antigen                                        | P08962 | 26 kDa  | 1.18 ± 0.8               | 0.808 ± 0.92  | 1             | (0, 3)  | 3                   | (0, 8)   | 1                         | (0, 2)  |    |
| 84      | CD81 antigen                                        | P60033 | 26 kDa  | 0.332 ± 0.4              | 0.331 ± 0.81  | 0             | (0, 2)  | 0                   | (0, 15)  | 0                         | (0, 2)  |    |
| 85      | CD9 antigen                                         | P21926 | 25 kDa  | 0.618 ± 0.7              | 0.203 ± 0.5   | 0             | (0, 2)  | 0                   | (0, 7)   | 0                         | (0, 2)  |    |
| 86      | Cell division control protein 42 homolog            | P60953 | 21 kDa  | 0.78 ± 1.4               | 0.072 ± 0.18  | 0             | (0, 4)  | 0                   | (0, 11)  | 0                         | (0, 2)  |    |
| 87      | Cell division cycle 5-like protein                  | Q99459 | 92 kDa  | 1.47 ± 0.89              | 0.607 ± 0.45  | 1             | (0, 3)  | 1                   | (0, 3)   | 1                         | (0, 2)  | 18 |
| 88      | Cell growth regulator with EF hand domain protein 1 | Q99674 | 32 kDa  | 2 ± 0.86                 | 1.54 ± 1.8    | 2             | (0, 5)  | 6                   | (0, 17)  | 1                         | (0, 4)  |    |
| 89      | Cellular retinoic acid-binding protein 2            | P29373 | 16 kDa  | 0.137 ± 0.35             | 0.0684 ± 0.17 | 0             | (0, 2)  | 0                   | (0, 12)  | 0                         | (0, 2)  |    |
| 90      | Ceruloplasmin                                       | P00450 | 122 kDa | 4.32 ± 6.6               | 15.7 ± 16     | 3             | (0, 46) | 4                   | (0, 30)  | 3                         | (0, 25) |    |
| 91      | Chitinase-3-like protein 1                          | P36222 | 43 kDa  | 1.45 ± 2.2               | 3.86 ± 7.6    | 1             | (0, 16) | 3                   | (0, 32)  | 1                         | (0, 9)  |    |
| 92      | Chitinase-3-like protein 2                          | Q15782 | 44 kDa  | 0.0353 ± 0.12            | 0 ± 0         | 0             | (0, 1)  | 0                   | (0, 7)   | 0                         | (0, 1)  |    |
| 93      | Chloride intracellular channel protein 1            | O00299 | 27 kDa  | 0.493 ± 0.6              | 0 ± 0         | 0             | (0, 2)  | 0                   | (0, 12)  | 0                         | (0, 2)  |    |
| 94      | Chordin-like protein 2                              | Q6WN34 | 47 kDa  | 71.8 ± 29                | 35.9 ± 32     | 66            | (5, 98) | 34                  | (11, 45) | 13                        | (4, 22) |    |
| 95      | Cluster of 14-3-3 protein zeta/delta                | P63104 | 28 kDa  | 6.23 ± 3.3               | 2.11 ± 1.8    | 5             | (0, 17) | 16                  | (0, 39)  | 4                         | (0, 14) | 24 |
| 96      | Cluster of Cofilin-1                                | P23528 | 19 kDa  | 5.29 ± 3.1               | 1.83 ± 1.9    | 4             | (0, 14) | 24                  | (0, 52)  | 3                         | (0, 7)  |    |

|         |                                                                       |        | Normalized Total Spectra |               | Total Spectra |       | % Sequence Coverage |       | Number of Unique Peptides |       |         |
|---------|-----------------------------------------------------------------------|--------|--------------------------|---------------|---------------|-------|---------------------|-------|---------------------------|-------|---------|
| Protein | Accession                                                             | MW     | non-GDM                  | GDM           | Median        | Range | Median              | Range | Median                    | Range | Rank    |
| 97      | Cluster of Eukaryotic translation initiation factor 5A-1              | P63241 | 17 kDa                   | 0.517 ± 1     | 0.0684 ± 0.17 | 0     | (0, 3)              | 0     | (0, 12)                   | 0     | (0, 2)  |
| 98      | Cluster of Frizzled-2                                                 | Q14332 | 64 kDa                   | 0.195 ± 0.44  | 0.675 ± 0.56  | 0     | (0, 2)              | 0     | (0, 3)                    | 0     | (0, 1)  |
| 99      | Cluster of Gamma-glutamyltranspeptidase 1                             | P19440 | 61 kDa                   | 2.28 ± 2.2    | 2.94 ± 0.87   | 2     | (0, 9)              | 3     | (0, 14)                   | 2     | (0, 7)  |
| 100     | Cluster of Haptoglobin                                                | P00738 | 45 kDa                   | 37.6 ± 12     | 30.8 ± 23     | 36    | (9, 82)             | 42    | (18, 60)                  | 18    | (7, 27) |
| 101     | Cluster of Heat shock cognate 71 kDa protein                          | P11142 | 71 kDa                   | 3.14 ± 1.7    | 0.787 ± 0.8   | 2     | (0, 9)              | 3     | (0, 12)                   | 1     | (0, 5)  |
| 102     | Cluster of Heat shock protein HSP 90-alpha                            | P07900 | 85 kDa                   | 0.564 ± 0.77  | 0 ± 0         | 0     | (0, 10)             | 0     | (0, 11)                   | 0     | (0, 8)  |
| 103     | Cluster of Hemoglobin subunit epsilon                                 | P02100 | 16 kDa                   | 0.0921 ± 0.32 | 0 ± 0         | 0     | (0, 2)              | 0     | (0, 13)                   | 0     | (0, 1)  |
| 104     | Cluster of Heterogeneous nuclear ribonucleoprotein A1                 | P09651 | 39 kDa                   | 0.304 ± 0.76  | 0.309 ± 0.76  | 0     | (0, 4)              | 0     | (0, 10)                   | 0     | (0, 3)  |
| 105     | Cluster of Histone H1.2                                               | P16403 | 21 kDa                   | 0 ± 0         | 0.185 ± 0.45  | 0     | (0, 2)              | 0     | (0, 11)                   | 0     | (0, 1)  |
| 106     | Cluster of Histone H2A type 1-C                                       | Q93077 | 14 kDa                   | 1.16 ± 2.4    | 1.01 ± 1.4    | 0     | (0, 12)             | 0     | (0, 27)                   | 0     | (0, 3)  |
| 107     | Cluster of Histone H2B type 1-L                                       | Q99880 | 14 kDa                   | 2.05 ± 3.3    | 4 ± 7.1       | 1     | (0, 25)             | 6     | (0, 46)                   | 1     | (0, 6)  |
| 108     | Cluster of Histone H3.1t                                              | Q16695 | 16 kDa                   | 0.475 ± 1.2   | 0.595 ± 1.2   | 0     | (0, 5)              | 0     | (0, 17)                   | 0     | (0, 3)  |
| 109     | Cluster of HLA class I histocompatibility antigen, Cw-7 alpha chain   | P10321 | 41 kDa                   | 1.34 ± 1.8    | 1.19 ± 1.1    | 1     | (0, 7)              | 2     | (0, 15)                   | 1     | (0, 5)  |
| 110     | Cluster of HLA class II histocompatibility antigen, DRB1-4 beta chain | P13760 | 30 kDa                   | 2.37 ± 5.2    | 0.34 ± 0.67   | 0     | (0, 21)             | 0     | (0, 31)                   | 0     | (0, 12) |
| 111     | Cluster of Ig heavy chain V-I region Mot                              | P06326 | 14 kDa                   | 8.51 ± 3.5    | 9.51 ± 1.4    | 8     | (3, 15)             | 14    | (10, 21)                  | 1     | (1, 3)  |
| 112     | Cluster of Ig heavy chain V-III region VH26                           | P01764 | 13 kDa                   | 10.1 ± 8.1    | 19.2 ± 9.9    | 10.5  | (1, 42)             | 29    | (10, 47)                  | 2     | (1, 7)  |



|         |                                                      |        |         | Normalized Total Spectra |             | Total Spectra |           | % Sequence Coverage |          | Number of Unique Peptides |         |    |
|---------|------------------------------------------------------|--------|---------|--------------------------|-------------|---------------|-----------|---------------------|----------|---------------------------|---------|----|
| Protein | Accession                                            | MW     | non-GDM | GDM                      | Median      | Range         | Median    | Range               | Median   | Range                     | Rank    |    |
| 113     | Cluster of Ig kappa chain V-I region WEA             | P01610 | 12 kDa  | 27.1 ± 14                | 37.5 ± 16   | 28            | (5, 68)   | 38                  | (27, 47) | 6                         | (0, 15) |    |
| 114     | Cluster of Ig kappa chain V-III region Ti            | P01622 | 12 kDa  | 28.4 ± 18                | 47.7 ± 20   | 27.5          | (7, 92)   | 58                  | (38, 77) | 4                         | (1, 18) |    |
| 115     | Cluster of Ig lambda chain V-II region BUR           | P01708 | 12 kDa  | 6.05 ± 3.1               | 12.4 ± 9.4  | 6             | (1, 29)   | 17                  | (7, 61)  | 2                         | (1, 12) |    |
| 116     | Cluster of Immunoglobulin lambda-like polypeptide 5  | B9A064 | 23 kDa  | 201 ± 59                 | 265 ± 42    | 195           | (79, 470) | 89                  | (51, 96) | 21                        | (8, 38) |    |
| 117     | Cluster of Keratin, type I cuticular Ha6             | O76013 | 52 kDa  | 1.65 ± 3.2               | 5 ± 12      | 1             | (0, 41)   | 2                   | (0, 30)  | 0                         | (0, 21) |    |
| 118     | Cluster of Keratin, type I cytoskeletal 10           | P13645 | 59 kDa  | 54.9 ± 21                | 54.9 ± 22   | 55            | (20, 109) | 38                  | (21, 48) | 17.5                      | (9, 26) |    |
| 119     | Cluster of Keratin, type I cytoskeletal 13           | P13646 | 50 kDa  | 3.53 ± 5.4               | 4.21 ± 5.1  | 5             | (0, 22)   | 4                   | (0, 9)   | 0                         | (0, 1)  |    |
| 120     | Cluster of Keratin, type I cytoskeletal 17           | Q04695 | 48 kDa  | 4.07 ± 4.1               | 5.01 ± 4.7  | 5             | (0, 19)   | 6                   | (0, 16)  | 0                         | (0, 1)  |    |
| 121     | Cluster of Keratin, type II cytoskeletal 2 epidermal | P35908 | 65 kDa  | 52 ± 24                  | 70 ± 38     | 56.5          | (10, 143) | 46                  | (15, 65) | 27.5                      | (6, 59) |    |
| 122     | Cluster of L-lactate dehydrogenase B chain           | P07195 | 37 kDa  | 0.134 ± 0.25             | 0 ± 0       | 0             | (0, 3)    | 0                   | (0, 11)  | 0                         | (0, 3)  |    |
| 123     | Cluster of Peptidyl-prolyl cis-trans isomerase A     | P62937 | 18 kDa  | 4.52 ± 2.4               | 1.84 ± 1.7  | 3             | (0, 9)    | 15                  | (0, 40)  | 2                         | (0, 6)  |    |
| 124     | Cluster of Plastin-2                                 | P13796 | 70 kDa  | 0.172 ± 0.6              | 0.131 ± 0.2 | 0             | (0, 3)    | 0                   | (0, 10)  | 0                         | (0, 3)  |    |
| 125     | Cluster of POTE ankyrin domain family member F       | A5A3E0 | 121 kDa | 20.7 ± 9.7               | 14.7 ± 7.7  | 17            | (4, 63)   | 32                  | (10, 60) | 11                        | (3, 19) | 27 |
| 126     | Cluster of Pregnancy-specific beta-1-glycoprotein 9  | Q00887 | 48 kDa  | 0.243 ± 0.38             | 0.2 ± 0.49  | 0             | (0, 1)    | 0                   | (0, 5)   | 0                         | (0, 1)  |    |
| 127     | Cluster of Pyruvate kinase isozymes M1/M2            | P14618 | 58 kDa  | 0.252 ± 0.63             | 0.124 ± 0.3 | 0             | (0, 3)    | 0                   | (0, 8)   | 0                         | (0, 3)  |    |
| 128     | Cluster of Ras-related protein Rab-8A                | P61006 | 24 kDa  | 0.254 ± 0.51             | 0 ± 0       | 0             | (0, 4)    | 0                   | (0, 12)  | 0                         | (0, 3)  |    |

|         |                                                                       |        |         | Normalized Total Spectra |               | Total Spectra |           | % Sequence Coverage |          | Number of Unique Peptides |           |    |
|---------|-----------------------------------------------------------------------|--------|---------|--------------------------|---------------|---------------|-----------|---------------------|----------|---------------------------|-----------|----|
| Protein | Accession                                                             | MW     | non-GDM | GDM                      | Median        | Range         | Median    | Range               | Median   | Range                     | Rank      |    |
| 129     | Cluster of Serum albumin                                              | P02768 | 69 kDa  | 238 ± 69                 | 374 ± 200     | 233           | (75, 887) | 76                  | (57, 83) | 58                        | (32, 106) |    |
| 130     | Cluster of Transforming protein RhoA                                  | P61586 | 22 kDa  | 1.33 ± 1.6               | 0.419 ± 0.52  | 1             | (0, 5)    | 0                   | (0, 23)  | 1                         | (0, 5)    |    |
| 131     | Cluster of Tropomyosin alpha-4 chain                                  | P67936 | 29 kDa  | 1.31 ± 1.4               | 0.634 ± 1.1   | 1             | (0, 5)    | 3                   | (0, 11)  | 1                         | (0, 4)    |    |
| 132     | Cluster of Tyrosine-protein phosphatase non-receptor type substrate 1 | P78324 | 55 kDa  | 0.173 ± 0.27             | 0.522 ± 0.86  | 0             | (0, 4)    | 0                   | (0, 10)  | 0                         | (0, 4)    |    |
| 133     | Cluster of Ubiquitin-60S ribosomal protein L40                        | P62987 | 15 kDa  | 7.63 ± 6                 | 3.68 ± 2.6    | 7             | (0, 22)   | 14                  | (0, 34)  | 2                         | (0, 4)    |    |
| 134     | Clusterin                                                             | P10909 | 52 kDa  | 250 ± 66                 | 166 ± 96      | 194           | (79, 455) | 51                  | (38, 61) | 29                        | (19, 40)  |    |
| 135     | Clusterin-like protein 1                                              | Q15846 | 54 kDa  | 0.149 ± 0.52             | 0 ± 0         | 0             | (0, 2)    | 0                   | (0, 5)   | 0                         | (0, 2)    |    |
| 136     | Cofilin-2                                                             | Q9Y281 | 19 kDa  | 0.118 ± 0.41             | 0 ± 0         | 2             | (0, 5)    | 7                   | (0, 21)  | 0                         | (0, 0)    |    |
| 137     | Collagen alpha-1(IV) chain                                            | P02462 | 161 kDa | 0.42 ± 0.72              | 0 ± 0         | 0             | (0, 2)    | 0                   | (0, 2)   | 0                         | (0, 2)    |    |
| 138     | Collagen alpha-1(VI) chain                                            | P12109 | 109 kDa | 0 ± 0                    | 0.0677 ± 0.17 | 0             | (0, 1)    | 0                   | (0, 2)   | 0                         | (0, 1)    |    |
| 139     | Collagen alpha-2(VI) chain                                            | P12110 | 109 kDa | 0.0964 ± 0.33            | 0 ± 0         | 0             | (0, 2)    | 0                   | (0, 2)   | 0                         | (0, 2)    |    |
| 140     | Complement C1q tumor necrosis factor-related protein 1                | Q9BXJ1 | 32 kDa  | 0.391 ± 0.46             | 0.2 ± 0.49    | 0             | (0, 2)    | 0                   | (0, 8)   | 0                         | (0, 2)    |    |
| 141     | Complement C1r subcomponent                                           | P00736 | 80 kDa  | 0.0396 ± 0.14            | 0 ± 0         | 0             | (0, 1)    | 0                   | (0, 5)   | 0                         | (0, 0)    |    |
| 142     | Complement C1r subcomponent-like protein                              | Q9NZP8 | 53 kDa  | 3.45 ± 1.1               | 2.33 ± 1.3    | 3             | (0, 8)    | 7                   | (0, 24)  | 2                         | (0, 7)    | 14 |
| 143     | Complement C1s subcomponent                                           | P09871 | 77 kDa  | 0 ± 0                    | 0.122 ± 0.3   | 0             | (0, 2)    | 0                   | (0, 6)   | 0                         | (0, 2)    |    |
| 144     | Complement C3                                                         | P01024 | 187 kDa | 82.1 ± 46                | 92 ± 55       | 73.5          | (22, 242) | 28                  | (11, 54) | 42                        | (16, 90)  |    |

|         |                                             |        | Normalized Total Spectra |               | Total Spectra |       | % Sequence Coverage |       | Number of Unique Peptides |       |         |
|---------|---------------------------------------------|--------|--------------------------|---------------|---------------|-------|---------------------|-------|---------------------------|-------|---------|
| Protein | Accession                                   | MW     | non-GDM                  | GDM           | Median        | Range | Median              | Range | Median                    | Range | Rank    |
| 145     | Complement C4-A                             | P0C0L4 | 193 kDa                  | 27.7 ± 22     | 36.4 ± 26     | 28    | (2, 102)            | 14    | (1, 36)                   | 1     | (0, 4)  |
| 146     | Complement C4-B                             | P0C0L5 | 193 kDa                  | 27.1 ± 22     | 35.8 ± 27     | 27.5  | (2, 101)            | 14    | (1, 37)                   | 1     | (0, 3)  |
| 147     | Complement component C7                     | P10643 | 94 kDa                   | 0.159 ± 0.29  | 0.785 ± 0.66  | 0     | (0, 2)              | 0     | (0, 2)                    | 0     | (0, 2)  |
| 148     | Complement decay-accelerating factor        | P08174 | 41 kDa                   | 0.0854 ± 0.2  | 0.597 ± 0.76  | 0     | (0, 3)              | 0     | (0, 6)                    | 0     | (0, 3)  |
| 149     | Complement factor B                         | P00751 | 86 kDa                   | 2.1 ± 1.8     | 2.38 ± 3.9    | 2     | (0, 16)             | 3     | (0, 20)                   | 2     | (0, 13) |
| 150     | Complement factor I                         | P05156 | 66 kDa                   | 3.61 ± 2.6    | 3.14 ± 2.3    | 3     | (0, 12)             | 4     | (0, 16)                   | 3     | (0, 8)  |
| 151     | Corticosteroid-binding globulin             | P08185 | 45 kDa                   | 0.13 ± 0.45   | 1.05 ± 1.7    | 0     | (0, 6)              | 0     | (0, 10)                   | 0     | (0, 3)  |
| 152     | C-type lectin domain family 11 member A     | Q9Y240 | 36 kDa                   | 14.8 ± 8.7    | 12.2 ± 6.9    | 10.5  | (0, 31)             | 28    | (0, 42)                   | 8     | (0, 12) |
| 153     | Cubilin                                     | O60494 | 399 kDa                  | 0.145 ± 0.34  | 0 ± 0         | 0     | (0, 2)              | 0     | (0, 1)                    | 0     | (0, 2)  |
| 154     | Cyclin-I2                                   | Q6ZMN8 | 41 kDa                   | 0.146 ± 0.28  | 0.209 ± 0.51  | 0     | (0, 2)              | 0     | (0, 6)                    | 0     | (0, 2)  |
| 155     | Cystatin-B                                  | P04080 | 11 kDa                   | 0.0654 ± 0.23 | 0.104 ± 0.25  | 0     | (0, 2)              | 0     | (0, 25)                   | 0     | (0, 2)  |
| 156     | Cystatin-C                                  | P01034 | 16 kDa                   | 11.2 ± 3.2    | 11 ± 6.2      | 10    | (3, 30)             | 39    | (23, 54)                  | 5     | (3, 8)  |
| 157     | Cysteine-rich motor neuron 1 protein        | Q9NZV1 | 114 kDa                  | 0.681 ± 1.1   | 0.3 ± 0.36    | 0     | (0, 4)              | 0     | (0, 3)                    | 0     | (0, 3)  |
| 158     | Cytosolic non-specific dipeptidase          | Q96KP4 | 53 kDa                   | 0.108 ± 0.25  | 0 ± 0         | 0     | (0, 3)              | 0     | (0, 9)                    | 0     | (0, 3)  |
| 159     | Dedicator of cytokinesis protein 4          | Q8N110 | 225 kDa                  | 0.45 ± 0.7    | 0.824 ± 1.3   | 0     | (0, 4)              | 0     | (0, 1)                    | 0     | (0, 2)  |
| 160     | Deleted in malignant brain tumors 1 protein | Q9UGM3 | 261 kDa                  | 0.135 ± 0.27  | 1.52 ± 1.3    | 0     | (0, 4)              | 0     | (0, 1)                    | 0     | (0, 2)  |

|         |                                                                |        |         | Normalized Total Spectra |               | Total Spectra |         | % Sequence Coverage |         | Number of Unique Peptides |         |   |
|---------|----------------------------------------------------------------|--------|---------|--------------------------|---------------|---------------|---------|---------------------|---------|---------------------------|---------|---|
| Protein | Accession                                                      | MW     | non-GDM | GDM                      | Median        | Range         | Median  | Range               | Median  | Range                     | Rank    |   |
| 161     | Dermcidin                                                      | P81605 | 11 kDa  | 1.96 ± 1.1               | 1.91 ± 0.67   | 2             | (0, 5)  | 10                  | (0, 41) | 1.5                       | (0, 3)  |   |
| 162     | Desmocollin-2                                                  | Q02487 | 100 kDa | 2.03 ± 1.6               | 0.831 ± 0.78  | 1             | (0, 6)  | 1                   | (0, 4)  | 1                         | (0, 3)  |   |
| 163     | Desmoplakin                                                    | P15924 | 332 kDa | 0.101 ± 0.35             | 0.513 ± 0.84  | 0             | (0, 3)  | 0                   | (0, 2)  | 0                         | (0, 3)  |   |
| 164     | Dipeptidyl peptidase 1                                         | P53634 | 52 kDa  | 2.15 ± 2.5               | 1.17 ± 1      | 1             | (0, 10) | 3                   | (0, 13) | 1                         | (0, 7)  |   |
| 165     | Disintegrin and metalloproteinase domain-containing protein 10 | O14672 | 84 kDa  | 0.263 ± 0.49             | 0.2 ± 0.49    | 0             | (0, 3)  | 0                   | (0, 5)  | 0                         | (0, 3)  |   |
| 166     | Disintegrin and metalloproteinase domain-containing protein 15 | Q13444 | 93 kDa  | 0.181 ± 0.35             | 0.0684 ± 0.17 | 0             | (0, 2)  | 0                   | (0, 3)  | 0                         | (0, 2)  |   |
| 167     | DNA polymerase delta catalytic subunit                         | P28340 | 124 kDa | 0.128 ± 0.31             | 0 ± 0         | 0             | (0, 2)  | 0                   | (0, 2)  | 0                         | (0, 1)  |   |
| 168     | DNA repair protein RAD50                                       | Q92878 | 154 kDa | 0.142 ± 0.36             | 0 ± 0         | 0             | (0, 2)  | 0                   | (0, 1)  | 0                         | (0, 2)  |   |
| 169     | Dynein heavy chain 10, axonemal                                | Q8IVF4 | 515 kDa | 0.176 ± 0.26             | 0.144 ± 0.35  | 0             | (0, 3)  | 0                   | (0, 1)  | 0                         | (0, 2)  |   |
| 170     | Dynein heavy chain 14, axonemal                                | Q0VDD8 | 400 kDa | 0.642 ± 0.63             | 1 ± 0.66      | 1             | (0, 3)  | 0                   | (0, 1)  | 1                         | (0, 2)  |   |
| 171     | Dystonin                                                       | Q03001 | 861 kDa | 6.76 ± 2.8               | 3.54 ± 2.3    | 5             | (0, 17) | 0                   | (0, 0)  | 1                         | (0, 2)  | 4 |
| 172     | Dystroglycan                                                   | Q14118 | 97 kDa  | 7.58 ± 5                 | 2.41 ± 2.8    | 6             | (0, 15) | 6                   | (0, 16) | 4                         | (0, 10) |   |
| 173     | E3 ubiquitin-protein ligase HERC2                              | O95714 | 527 kDa | 0.0648 ± 0.22            | 0 ± 0         | 0             | (0, 2)  | 0                   | (0, 0)  | 0                         | (0, 2)  |   |
| 174     | EGF-containing fibulin-like extracellular matrix protein 1     | Q12805 | 55 kDa  | 0.84 ± 1.4               | 2.44 ± 3.3    | 0             | (0, 8)  | 0                   | (0, 20) | 0                         | (0, 7)  |   |
| 175     | Elongation factor 1-alpha 1                                    | P68104 | 50 kDa  | 1.25 ± 1.1               | 0.482 ± 0.9   | 1             | (0, 9)  | 2                   | (0, 18) | 0                         | (0, 2)  |   |
| 176     | Elongation factor 1-alpha 2                                    | Q05639 | 50 kDa  | 0.62 ± 0.83              | 0.482 ± 0.9   | 1             | (0, 6)  | 2                   | (0, 10) | 0                         | (0, 0)  |   |

|         |                                              |        | Normalized Total Spectra |               | Total Spectra |       | % Sequence Coverage |       | Number of Unique Peptides |       |         |    |
|---------|----------------------------------------------|--------|--------------------------|---------------|---------------|-------|---------------------|-------|---------------------------|-------|---------|----|
| Protein | Accession                                    | MW     | non-GDM                  | GDM           | Median        | Range | Median              | Range | Median                    | Range | Rank    |    |
| 177     | Elongation factor 2                          | P13639 | 95 kDa                   | 0.101 ± 0.35  | 0 ± 0         | 0     | (0, 3)              | 0     | (0, 4)                    | 0     | (0, 3)  |    |
| 178     | Endoglin                                     | P17813 | 71 kDa                   | 0.0726 ± 0.17 | 0.231 ± 0.37  | 0     | (0, 1)              | 0     | (0, 4)                    | 0     | (0, 1)  |    |
| 179     | Ephrin-A1                                    | P20827 | 24 kDa                   | 2.26 ± 2.9    | 1.6 ± 1.4     | 1     | (0, 11)             | 4     | (0, 24)                   | 1     | (0, 6)  |    |
| 180     | Epididymal secretory protein E1              | P61916 | 17 kDa                   | 1.39 ± 2.3    | 0.559 ± 0.73  | 0     | (0, 11)             | 0     | (0, 44)                   | 0     | (0, 6)  |    |
| 181     | Erythrocyte band 7 integral membrane protein | P27105 | 32 kDa                   | 0.522 ± 1     | 0.384 ± 0.49  | 0     | (0, 4)              | 0     | (0, 10)                   | 0     | (0, 3)  |    |
| 182     | Extracellular sulfatase Sulf-2               | Q8IWU5 | 100 kDa                  | 0.243 ± 0.51  | 0 ± 0         | 0     | (0, 2)              | 0     | (0, 3)                    | 0     | (0, 2)  |    |
| 183     | Extracellular superoxide dismutase [Cu-Zn]   | P08294 | 26 kDa                   | 0.487 ± 0.57  | 0.711 ± 0.76  | 0     | (0, 3)              | 0     | (0, 12)                   | 0     | (0, 2)  |    |
| 184     | Ezrin                                        | P15311 | 69 kDa                   | 1 ± 1.5       | 0.0672 ± 0.16 | 0     | (0, 5)              | 0     | (0, 8)                    | 0     | (0, 3)  |    |
| 185     | Fatty acid synthase                          | P49327 | 273 kDa                  | 1.93 ± 2.4    | 0.221 ± 0.54  | 0     | (0, 80)             | 0     | (0, 31)                   | 0     | (0, 55) | 19 |
| 186     | Fatty acid-binding protein, epidermal        | Q01469 | 15 kDa                   | 0.841 ± 0.81  | 1.65 ± 1.2    | 1     | (0, 6)              | 7     | (0, 29)                   | 1     | (0, 5)  |    |
| 187     | Fatty acid-binding protein, heart            | P05413 | 15 kDa                   | 24.8 ± 12     | 12.2 ± 12     | 21.5  | (1, 45)             | 53    | (0, 73)                   | 7     | (1, 12) |    |
| 188     | Ferritin heavy chain                         | P02794 | 21 kDa                   | 6.05 ± 4.5    | 3.48 ± 1.8    | 5     | (0, 13)             | 21    | (0, 54)                   | 4     | (0, 8)  |    |
| 189     | Fibrinogen alpha chain                       | P02671 | 95 kDa                   | 4.01 ± 3.3    | 2.49 ± 2.9    | 3.5   | (0, 18)             | 4     | (0, 17)                   | 2.5   | (0, 11) |    |
| 190     | Fibrinogen beta chain                        | P02675 | 56 kDa                   | 3.91 ± 6.3    | 2.26 ± 2.2    | 1     | (0, 28)             | 3     | (0, 41)                   | 1     | (0, 15) |    |
| 191     | Fibrinogen gamma chain                       | P02679 | 52 kDa                   | 1.96 ± 3.1    | 2.21 ± 2.1    | 1.5   | (0, 18)             | 2     | (0, 29)                   | 1     | (0, 11) |    |
| 192     | Fibronectin                                  | P02751 | 263 kDa                  | 0.537 ± 0.89  | 0.152 ± 0.24  | 0     | (0, 5)              | 0     | (0, 2)                    | 0     | (0, 5)  |    |

|         |                                                           |        |         | Normalized Total Spectra |                  | Total Spectra |          | % Sequence Coverage |          | Number of Unique Peptides |         |  |
|---------|-----------------------------------------------------------|--------|---------|--------------------------|------------------|---------------|----------|---------------------|----------|---------------------------|---------|--|
| Protein | Accession                                                 | MW     | non-GDM | GDM                      | Median           | Range         | Median   | Range               | Median   | Range                     | Rank    |  |
| 193     | Fibrous sheath-interacting protein 2                      | Q5CZC0 | 781 kDa | $0.0705 \pm 0.24$        | $0 \pm 0$        | 0             | (0, 2)   | 0                   | (0, 0)   | 0                         | (0, 2)  |  |
| 194     | Filaggrin                                                 | P20930 | 435 kDa | $0.782 \pm 0.88$         | $9.29 \pm 15$    | 1             | (0, 54)  | 0                   | (0, 11)  | 1                         | (0, 35) |  |
| 195     | Filaggrin-2                                               | Q5D862 | 248 kDa | $0.344 \pm 0.56$         | $1.51 \pm 3.5$   | 0             | (0, 12)  | 0                   | (0, 4)   | 0                         | (0, 7)  |  |
| 196     | Folate receptor alpha                                     | P15328 | 30 kDa  | $2.05 \pm 0.83$          | $1.89 \pm 0.54$  | 2             | (0, 6)   | 9                   | (0, 25)  | 2                         | (0, 5)  |  |
| 197     | Follistatin-related protein 1                             | Q12841 | 35 kDa  | $24.1 \pm 11$            | $16.4 \pm 7.7$   | 19            | (6, 47)  | 30                  | (12, 45) | 9                         | (4, 13) |  |
| 198     | Frizzled-1                                                | Q9UP38 | 71 kDa  | $0.262 \pm 0.47$         | $0.408 \pm 0.35$ | 0             | (0, 2)   | 0                   | (0, 3)   | 0                         | (0, 1)  |  |
| 199     | G protein-regulated inducer of neurite outgrowth 1        | Q7Z2K8 | 102 kDa | $0.6 \pm 1.2$            | $1.69 \pm 1.9$   | 0             | (0, 6)   | 0                   | (0, 2)   | 0                         | (0, 2)  |  |
| 200     | Galectin-1                                                | P09382 | 15 kDa  | $0.0692 \pm 0.24$        | $0.51 \pm 0.82$  | 0             | (0, 3)   | 0                   | (0, 30)  | 0                         | (0, 3)  |  |
| 201     | Galectin-3-binding protein                                | Q08380 | 65 kDa  | $46.5 \pm 10$            | $46.7 \pm 12$    | 39.5          | (19, 92) | 32                  | (22, 41) | 16                        | (9, 25) |  |
| 202     | Gamma-glutamyltranspeptidase 2                            | P36268 | 62 kDa  | $1.27 \pm 1.7$           | $2.03 \pm 0.96$  | 2             | (0, 6)   | 3                   | (0, 8)   | 0                         | (0, 0)  |  |
| 203     | Gamma-interferon-inducible lysosomal thiol reductase      | P13284 | 28 kDa  | $0 \pm 0$                | $0.203 \pm 0.5$  | 0             | (0, 3)   | 0                   | (0, 13)  | 0                         | (0, 3)  |  |
| 204     | Ganglioside GM2 activator                                 | P17900 | 21 kDa  | $1.75 \pm 1.2$           | $1.33 \pm 1.4$   | 1             | (0, 6)   | 6                   | (0, 28)  | 1                         | (0, 5)  |  |
| 205     | Gelsolin                                                  | P06396 | 86 kDa  | $1.23 \pm 1.8$           | $3.12 \pm 2.6$   | 1             | (0, 9)   | 1                   | (0, 16)  | 1                         | (0, 9)  |  |
| 206     | Glutaredoxin-1                                            | P35754 | 12 kDa  | $0.106 \pm 0.37$         | $0 \pm 0$        | 0             | (0, 3)   | 0                   | (0, 21)  | 0                         | (0, 2)  |  |
| 207     | Glyceraldehyde-3-phosphate dehydrogenase                  | P04406 | 36 kDa  | $2.22 \pm 4$             | $0.293 \pm 0.48$ | 0.5           | (0, 18)  | 1                   | (0, 42)  | 0                         | (0, 10) |  |
| 208     | Glyceraldehyde-3-phosphate dehydrogenase, testis-specific | O14556 | 45 kDa  | $0.506 \pm 1.2$          | $0 \pm 0$        | 0             | (0, 5)   | 0                   | (0, 7)   | 0                         | (0, 1)  |  |

|         |                                                                    |        |         | Normalized Total Spectra |              | Total Spectra |         | % Sequence Coverage |         | Number of Unique Peptides |         |    |
|---------|--------------------------------------------------------------------|--------|---------|--------------------------|--------------|---------------|---------|---------------------|---------|---------------------------|---------|----|
| Protein | Accession                                                          | MW     | non-GDM | GDM                      | Median       | Range         | Median  | Range               | Median  | Range                     | Rank    |    |
| 209     | Golgi membrane protein 1                                           | Q8NBJ4 | 45 kDa  | 11.5 ± 4.6               | 4.35 ± 5.2   | 8.5           | (0, 24) | 14                  | (0, 33) | 5                         | (0, 12) | 25 |
| 210     | Golgi-associated plant pathogenesis-related protein 1              | Q9H4G4 | 17 kDa  | 1.53 ± 1.2               | 0.823 ± 1.3  | 1             | (0, 4)  | 8                   | (0, 22) | 1                         | (0, 3)  |    |
| 211     | G-protein coupled receptor 126                                     | Q86SQ4 | 137 kDa | 1.84 ± 0.89              | 2.14 ± 1.8   | 2             | (0, 8)  | 2                   | (0, 7)  | 2                         | (0, 6)  |    |
| 212     | G-protein coupled receptor 56                                      | Q9Y653 | 78 kDa  | 0.544 ± 0.61             | 0.205 ± 0.5  | 0             | (0, 3)  | 0                   | (0, 3)  | 0                         | (0, 2)  |    |
| 213     | G-protein coupled receptor family C group 5 member B               | Q9NZH0 | 45 kDa  | 1.26 ± 1.2               | 1.09 ± 1.4   | 1             | (0, 3)  | 2                   | (0, 8)  | 1                         | (0, 3)  |    |
| 214     | Granulins                                                          | P28799 | 64 kDa  | 0.612 ± 1.7              | 0.968 ± 0.94 | 0             | (0, 7)  | 0                   | (0, 12) | 0                         | (0, 6)  |    |
| 215     | Guanine nucleotide-binding protein G(I)/G(S)/G(O) subunit gamma-12 | Q9UBI6 | 8 kDa   | 0.501 ± 0.65             | 0.251 ± 0.39 | 0             | (0, 2)  | 0                   | (0, 25) | 0                         | (0, 2)  |    |
| 216     | Haptoglobin-related protein                                        | P00739 | 39 kDa  | 8.15 ± 11                | 10.6 ± 17    | 20            | (1, 52) | 21                  | (3, 34) | 0                         | (0, 0)  |    |
| 217     | HEAT repeat-containing protein 1                                   | Q9H583 | 242 kDa | 0.226 ± 0.31             | 0.281 ± 0.69 | 0             | (0, 2)  | 0                   | (0, 1)  | 0                         | (0, 2)  |    |
| 218     | Heat shock 70 kDa protein 1-like                                   | P34931 | 70 kDa  | 0.621 ± 1                | 0.135 ± 0.21 | 1             | (0, 4)  | 2                   | (0, 6)  | 0                         | (0, 2)  |    |
| 219     | Heat shock protein HSP 90-beta                                     | P08238 | 83 kDa  | 0.256 ± 0.52             | 0 ± 0        | 0             | (0, 3)  | 0                   | (0, 5)  | 0                         | (0, 1)  |    |
| 220     | Heat shock-related 70 kDa protein 2                                | P54652 | 70 kDa  | 0.158 ± 0.43             | 0.063 ± 0.15 | 1             | (0, 5)  | 2                   | (0, 4)  | 0                         | (0, 0)  |    |
| 221     | Hemoglobin subunit alpha                                           | P69905 | 15 kDa  | 0.317 ± 0.54             | 0 ± 0        | 0             | (0, 5)  | 0                   | (0, 30) | 0                         | (0, 3)  |    |
| 222     | Hemoglobin subunit beta                                            | P68871 | 16 kDa  | 0.731 ± 1.3              | 0.072 ± 0.18 | 0             | (0, 8)  | 0                   | (0, 54) | 0                         | (0, 5)  |    |
| 223     | Hemoglobin subunit gamma-1                                         | P69891 | 16 kDa  | 0.0921 ± 0.32            | 0 ± 0        | 0             | (0, 2)  | 0                   | (0, 13) | 0                         | (0, 0)  |    |
| 224     | Hemopexin                                                          | P02790 | 52 kDa  | 10.4 ± 6.5               | 10.6 ± 5.2   | 10.5          | (2, 27) | 17                  | (4, 38) | 6                         | (2, 13) |    |

|         |                                                          |        | Normalized Total Spectra |               | Total Spectra |       | % Sequence Coverage |       | Number of Unique Peptides |       |        |
|---------|----------------------------------------------------------|--------|--------------------------|---------------|---------------|-------|---------------------|-------|---------------------------|-------|--------|
| Protein | Accession                                                | MW     | non-GDM                  | GDM           | Median        | Range | Median              | Range | Median                    | Range | Rank   |
| 225     | Heterogeneous nuclear ribonucleoproteins A2/B1           | P22626 | 37 kDa                   | 0.238 ± 0.49  | 0.309 ± 0.76  | 0     | (0, 3)              | 0     | (0, 6)                    | 0     | (0, 1) |
| 226     | Histidine-rich glycoprotein                              | P04196 | 60 kDa                   | 0.0632 ± 0.22 | 1.18 ± 2.9    | 0     | (0, 11)             | 0     | (0, 9)                    | 0     | (0, 4) |
| 227     | Histone H1.3                                             | P16402 | 22 kDa                   | 0 ± 0         | 0.185 ± 0.45  | 0     | (0, 2)              | 0     | (0, 10)                   | 0     | (0, 0) |
| 228     | Histone H2A type 2-C                                     | Q16777 | 14 kDa                   | 0.993 ± 2.5   | 0.93 ± 1.4    | 0     | (0, 12)             | 0     | (0, 27)                   | 0     | (0, 0) |
| 229     | Histone H2A.Z                                            | P0C0S5 | 14 kDa                   | 0.886 ± 1.9   | 0.723 ± 1.2   | 0     | (0, 9)              | 0     | (0, 13)                   | 0     | (0, 0) |
| 230     | Histone H2B type 1-D                                     | P58876 | 14 kDa                   | 0.896 ± 3.1   | 2.98 ± 7.3    | 1     | (0, 25)             | 6     | (0, 46)                   | 0     | (0, 0) |
| 231     | Histone H2B type 1-J                                     | P06899 | 14 kDa                   | 1.68 ± 2.9    | 3.74 ± 6.9    | 1     | (0, 24)             | 6     | (0, 39)                   | 0     | (0, 0) |
| 232     | Histone H2B type 1-M                                     | Q99879 | 14 kDa                   | 1.33 ± 3.2    | 3.56 ± 7.1    | 1     | (0, 25)             | 6     | (0, 46)                   | 0     | (0, 0) |
| 233     | Histone H2B type 1-N                                     | Q99877 | 14 kDa                   | 1.85 ± 3.4    | 3.87 ± 7.2    | 1     | (0, 25)             | 6     | (0, 46)                   | 0     | (0, 0) |
| 234     | Histone H3.3                                             | P84243 | 15 kDa                   | 0.346 ± 1.2   | 0.498 ± 1.2   | 0     | (0, 5)              | 0     | (0, 17)                   | 0     | (0, 0) |
| 235     | Histone H4                                               | P62805 | 11 kDa                   | 0.547 ± 1.5   | 1.47 ± 3.1    | 0     | (0, 11)             | 0     | (0, 51)                   | 0     | (0, 5) |
| 236     | HLA class I histocompatibility antigen, A-2 alpha chain  | P01892 | 41 kDa                   | 0.206 ± 0.71  | 0 ± 0         | 0     | (0, 3)              | 0     | (0, 9)                    | 0     | (0, 0) |
| 237     | HLA class I histocompatibility antigen, A-33 alpha chain | P16190 | 41 kDa                   | 0.0822 ± 0.28 | 0 ± 0         | 0     | (0, 2)              | 0     | (0, 9)                    | 0     | (0, 0) |
| 238     | HLA class I histocompatibility antigen, B-39 alpha chain | P30475 | 40 kDa                   | 0.165 ± 0.57  | 0.22 ± 0.54   | 1     | (0, 4)              | 2     | (0, 11)                   | 0     | (0, 1) |
| 239     | HLA class I histocompatibility antigen, Cw-4 alpha chain | P30504 | 41 kDa                   | 0.234 ± 0.6   | 0.648 ± 1.1   | 1     | (0, 4)              | 2     | (0, 6)                    | 0     | (0, 0) |
| 240     | HLA class II histocompatibility antigen gamma chain      | P04233 | 34 kDa                   | 8.1 ± 5.3     | 3.41 ± 5.1    | 4.5   | (0, 25)             | 10    | (0, 16)                   | 3     | (0, 4) |



|         |                                                             |        |         | Normalized Total Spectra |              | Total Spectra |             | % Sequence Coverage |          | Number of Unique Peptides |         |  |
|---------|-------------------------------------------------------------|--------|---------|--------------------------|--------------|---------------|-------------|---------------------|----------|---------------------------|---------|--|
| Protein | Accession                                                   | MW     | non-GDM | GDM                      | Median       | Range         | Median      | Range               | Median   | Range                     | Rank    |  |
| 241     | HLA class II histocompatibility antigen, DP alpha 1 chain   | P20036 | 29 kDa  | 0.078 ± 0.27             | 0 ± 0        | 0             | (0, 2)      | 0                   | (0, 7)   | 0                         | (0, 2)  |  |
| 242     | HLA class II histocompatibility antigen, DQ beta 1 chain    | P01920 | 30 kDa  | 0.118 ± 0.41             | 0 ± 0        | 0             | (0, 2)      | 0                   | (0, 8)   | 0                         | (0, 2)  |  |
| 243     | HLA class II histocompatibility antigen, DR alpha chain     | P01903 | 29 kDa  | 1.01 ± 2.3               | 0.609 ± 0.94 | 0             | (0, 9)      | 0                   | (0, 30)  | 0                         | (0, 5)  |  |
| 244     | HLA class II histocompatibility antigen, DR beta 5 chain    | Q30154 | 30 kDa  | 0.782 ± 2.6              | 0 ± 0        | 0             | (0, 10)     | 0                   | (0, 25)  | 0                         | (0, 1)  |  |
| 245     | HLA class II histocompatibility antigen, DRB1-1 beta chain  | P04229 | 30 kDa  | 1.12 ± 2.9               | 0 ± 0        | 0             | (0, 11)     | 0                   | (0, 27)  | 0                         | (0, 1)  |  |
| 246     | HLA class II histocompatibility antigen, DRB1-13 beta chain | Q5Y7A7 | 30 kDa  | 1.11 ± 2.5               | 0 ± 0        | 0             | (0, 11)     | 0                   | (0, 23)  | 0                         | (0, 1)  |  |
| 247     | HLA class II histocompatibility antigen, DRB1-8 beta chain  | Q30134 | 30 kDa  | 0.722 ± 2.2              | 0 ± 0        | 0             | (0, 9)      | 0                   | (0, 23)  | 0                         | (0, 1)  |  |
| 248     | Hornerin                                                    | Q86YZ3 | 282 kDa | 3.88 ± 3.3               | 6.92 ± 4.8   | 5             | (0, 17)     | 1                   | (0, 4)   | 2                         | (0, 6)  |  |
| 249     | Hyaluronan and proteoglycan link protein 3                  | Q96S86 | 41 kDa  | 5.48 ± 3.4               | 2.4 ± 1.3    | 3             | (0, 16)     | 8                   | (0, 34)  | 3                         | (0, 9)  |  |
| 250     | Hypoxia up-regulated protein 1                              | Q9Y4L1 | 111 kDa | 0.438 ± 0.58             | 0.072 ± 0.18 | 0             | (0, 2)      | 0                   | (0, 2)   | 0                         | (0, 1)  |  |
| 251     | Ig alpha-1 chain C region                                   | P01876 | 38 kDa  | 463 ± 300                | 795 ± 280    | 407           | (129, 1805) | 76                  | (67, 94) | 17                        | (9, 39) |  |
| 252     | Ig alpha-2 chain C region                                   | P01877 | 37 kDa  | 392 ± 210                | 698 ± 250    | 366.5         | (93, 1438)  | 70                  | (57, 84) | 15.5                      | (4, 32) |  |
| 253     | Ig delta chain C region                                     | P01880 | 42 kDa  | 0.352 ± 1.2              | 0 ± 0        | 0             | (0, 6)      | 0                   | (0, 18)  | 0                         | (0, 5)  |  |
| 254     | Ig gamma-1 chain C region                                   | P01857 | 36 kDa  | 12.1 ± 8.6               | 25.4 ± 16    | 10.5          | (3, 63)     | 32                  | (9, 61)  | 3                         | (1, 7)  |  |
| 255     | Ig gamma-2 chain C region                                   | P01859 | 36 kDa  | 4.54 ± 3.8               | 10.2 ± 7.5   | 4             | (1, 25)     | 13                  | (2, 42)  | 1                         | (0, 4)  |  |
| 256     | Ig gamma-3 chain C region                                   | P01860 | 41 kDa  | 7.47 ± 5.6               | 15.7 ± 9.8   | 6.5           | (2, 38)     | 13                  | (4, 35)  | 0                         | (0, 4)  |  |

|         |                                   |        | Normalized Total Spectra |              | Total Spectra |       | % Sequence Coverage |       | Number of Unique Peptides |       |        |   |
|---------|-----------------------------------|--------|--------------------------|--------------|---------------|-------|---------------------|-------|---------------------------|-------|--------|---|
| Protein | Accession                         | MW     | non-GDM                  | GDM          | Median        | Range | Median              | Range | Median                    | Range | Rank   |   |
| 257     | Ig gamma-4 chain C region         | P01861 | 36 kDa                   | 4.32 ± 5.6   | 11.4 ± 8.2    | 4     | (1, 31)             | 13    | (2, 38)                   | 0     | (0, 2) |   |
| 258     | Ig heavy chain V-I region EU      | P01742 | 12 kDa                   | 8.03 ± 3.1   | 8.41 ± 1.8    | 7     | (3, 14)             | 10    | (10, 21)                  | 0     | (0, 1) |   |
| 259     | Ig heavy chain V-I region HG3     | P01743 | 13 kDa                   | 3.52 ± 2.7   | 4.29 ± 2.7    | 2.5   | (0, 13)             | 9     | (0, 31)                   | 1     | (0, 2) |   |
| 260     | Ig heavy chain V-I region SIE     | P01761 | 14 kDa                   | 1.43 ± 3.9   | 3.06 ± 3.7    | 7     | (3, 14)             | 10    | (10, 17)                  | 0     | (0, 0) |   |
| 261     | Ig heavy chain V-I region V35     | P23083 | 13 kDa                   | 3.17 ± 2.7   | 4.36 ± 3.6    | 2     | (0, 14)             | 10    | (0, 49)                   | 1.5   | (0, 4) |   |
| 262     | Ig heavy chain V-I region WOL     | P01760 | 14 kDa                   | 0.788 ± 1.7  | 1.53 ± 1.7    | 0     | (0, 8)              | 0     | (0, 18)                   | 0     | (0, 2) |   |
| 263     | Ig heavy chain V-II region ARH-77 | P06331 | 16 kDa                   | 1.15 ± 1.7   | 2.04 ± 1.6    | 0     | (0, 9)              | 0     | (0, 22)                   | 0     | (0, 2) | 2 |
| 264     | Ig heavy chain V-II region NEWM   | P01825 | 13 kDa                   | 0.52 ± 0.94  | 0.611 ± 1.1   | 0     | (0, 7)              | 0     | (0, 25)                   | 0     | (0, 1) |   |
| 265     | Ig heavy chain V-II region OU     | P01814 | 14 kDa                   | 0.998 ± 1.5  | 2.03 ± 1.6    | 0     | (0, 7)              | 0     | (0, 18)                   | 0     | (0, 3) |   |
| 266     | Ig heavy chain V-II region SESS   | P04438 | 16 kDa                   | 0.838 ± 1.1  | 1.83 ± 1.4    | 0     | (0, 4)              | 0     | (0, 20)                   | 0     | (0, 1) |   |
| 267     | Ig heavy chain V-II region WAH    | P01824 | 14 kDa                   | 0.126 ± 0.44 | 0.631 ± 0.7   | 0     | (0, 4)              | 0     | (0, 21)                   | 0     | (0, 3) |   |
| 268     | Ig heavy chain V-III region BRO   | P01766 | 13 kDa                   | 13.2 ± 6.1   | 19.8 ± 6.8    | 11.5  | (2, 33)             | 25    | (25, 38)                  | 0     | (0, 1) |   |
| 269     | Ig heavy chain V-III region BUR   | P01773 | 13 kDa                   | 0.672 ± 1.6  | 0.986 ± 1     | 0     | (0, 9)              | 0     | (0, 23)                   | 0     | (0, 4) |   |
| 270     | Ig heavy chain V-III region BUT   | P01767 | 12 kDa                   | 3.91 ± 1.8   | 5.32 ± 1.8    | 3     | (1, 11)             | 21    | (10, 44)                  | 0.5   | (0, 3) |   |
| 271     | Ig heavy chain V-III region CAM   | P01768 | 14 kDa                   | 1.76 ± 2.9   | 4.43 ± 4.8    | 0     | (0, 18)             | 0     | (0, 43)                   | 0     | (0, 3) |   |
| 272     | Ig heavy chain V-III region DOB   | P01782 | 13 kDa                   | 0.128 ± 0.44 | 0.24 ± 0.59   | 0     | (0, 3)              | 0     | (0, 20)                   | 0     | (0, 1) |   |

|         |                                 |        | Normalized Total Spectra |              | Total Spectra |       | % Sequence Coverage |       | Number of Unique Peptides |       |         |
|---------|---------------------------------|--------|--------------------------|--------------|---------------|-------|---------------------|-------|---------------------------|-------|---------|
| Protein | Accession                       | MW     | non-GDM                  | GDM          | Median        | Range | Median              | Range | Median                    | Range | Rank    |
| 273     | Ig heavy chain V-III region GA  | P01769 | 13 kDa                   | 0.205 ± 0.6  | 0.59 ± 1      | 0     | (0, 6)              | 0     | (0, 25)                   | 0     | (0, 2)  |
| 274     | Ig heavy chain V-III region GAL | P01781 | 13 kDa                   | 4.08 ± 4     | 7.8 ± 4.5     | 3     | (0, 15)             | 31    | (0, 52)                   | 2     | (0, 5)  |
| 275     | Ig heavy chain V-III region GAR | P80419 | 13 kDa                   | 0.392 ± 0.56 | 0.625 ± 0.75  | 0     | (0, 3)              | 0     | (0, 25)                   | 0     | (0, 2)  |
| 276     | Ig heavy chain V-III region HIL | P01771 | 14 kDa                   | 1.2 ± 1.6    | 1.88 ± 1.1    | 1     | (0, 7)              | 9     | (0, 40)                   | 1     | (0, 5)  |
| 277     | Ig heavy chain V-III region JON | P01780 | 13 kDa                   | 0.43 ± 0.92  | 1.64 ± 1.5    | 0     | (0, 7)              | 0     | (0, 25)                   | 0     | (0, 3)  |
| 278     | Ig heavy chain V-III region KOL | P01772 | 14 kDa                   | 3.83 ± 2.3   | 5.24 ± 3.2    | 3     | (0, 14)             | 13    | (0, 21)                   | 1     | (0, 2)  |
| 279     | Ig heavy chain V-III region NIE | P01770 | 13 kDa                   | 0.768 ± 1    | 1.05 ± 1.1    | 0     | (0, 4)              | 5     | (0, 35)                   | 0     | (0, 2)  |
| 280     | Ig heavy chain V-III region POM | P01774 | 13 kDa                   | 1.75 ± 5.1   | 9.98 ± 8.6    | 5     | (0, 28)             | 16    | (0, 32)                   | 0     | (0, 1)  |
| 281     | Ig heavy chain V-III region TEI | P01777 | 13 kDa                   | 9.36 ± 6.5   | 16.7 ± 6.7    | 10    | (1, 29)             | 16    | (16, 24)                  | 0     | (0, 1)  |
| 282     | Ig heavy chain V-III region TIL | P01765 | 12 kDa                   | 7.71 ± 6.3   | 15.5 ± 7.4    | 8.5   | (1, 32)             | 26    | (10, 26)                  | 0     | (0, 0)  |
| 283     | Ig heavy chain V-III region TRO | P01762 | 13 kDa                   | 5.95 ± 3.5   | 8.71 ± 3      | 5     | (0, 21)             | 16    | (0, 37)                   | 1     | (0, 3)  |
| 284     | Ig heavy chain V-III region TUR | P01779 | 12 kDa                   | 4.67 ± 5.8   | 11.1 ± 8.6    | 6     | (0, 29)             | 25    | (0, 35)                   | 0     | (0, 1)  |
| 285     | Ig heavy chain V-III region WAS | P01776 | 13 kDa                   | 4.84 ± 5.1   | 11.7 ± 7.2    | 5     | (0, 28)             | 16    | (0, 33)                   | 0     | (0, 1)  |
| 286     | Ig heavy chain V-III region WEA | P01763 | 12 kDa                   | 1.69 ± 2.3   | 3.59 ± 2.3    | 2.5   | (1, 10)             | 10    | (10, 44)                  | 0     | (0, 2)  |
| 287     | Ig kappa chain C region         | P01834 | 12 kDa                   | 363 ± 180    | 585 ± 270     | 296.5 | (94, 1060)          | 80    | (78, 93)                  | 16    | (8, 31) |
| 288     | Ig kappa chain V-I region AG    | P01593 | 12 kDa                   | 3.08 ± 8.3   | 7.55 ± 8.6    | 16.5  | (3, 38)             | 32    | (17, 32)                  | 0     | (0, 0)  |

|         |                                            |        | Normalized Total Spectra |              | Total Spectra |       | % Sequence Coverage |       | Number of Unique Peptides |       |        |
|---------|--------------------------------------------|--------|--------------------------|--------------|---------------|-------|---------------------|-------|---------------------------|-------|--------|
| Protein | Accession                                  | MW     | non-GDM                  | GDM          | Median        | Range | Median              | Range | Median                    | Range | Rank   |
| 289     | Ig kappa chain V-I region AU               | P01594 | 12 kDa                   | 14.1 ± 11    | 21 ± 9.1      | 16.5  | (3, 39)             | 32    | (17, 47)                  | 1     | (0, 3) |
| 290     | Ig kappa chain V-I region BAN              | P04430 | 12 kDa                   | 1.03 ± 2.4   | 6.2 ± 5.3     | 0     | (0, 18)             | 0     | (0, 47)                   | 0     | (0, 4) |
| 291     | Ig kappa chain V-I region CAR              | P01596 | 12 kDa                   | 8.33 ± 6.9   | 20.4 ± 10     | 9     | (1, 46)             | 26    | (17, 55)                  | 0     | (0, 3) |
| 292     | Ig kappa chain V-I region Daudi            | P04432 | 14 kDa                   | 0.736 ± 2.5  | 0.612 ± 1.5   | 0     | (0, 10)             | 0     | (0, 33)                   | 0     | (0, 2) |
| 293     | Ig kappa chain V-I region DEE              | P01597 | 12 kDa                   | 7.31 ± 8.6   | 20.4 ± 18     | 1     | (0, 45)             | 10    | (0, 47)                   | 1     | (0, 4) |
| 294     | Ig kappa chain V-I region EU               | P01598 | 12 kDa                   | 9.88 ± 7     | 21.1 ± 11     | 10    | (1, 45)             | 36    | (17, 49)                  | 1     | (0, 3) |
| 295     | Ig kappa chain V-I region Gal              | P01599 | 12 kDa                   | 14.4 ± 10    | 22.4 ± 7.4    | 17.5  | (4, 41)             | 28    | (17, 44)                  | 1     | (0, 5) |
| 296     | Ig kappa chain V-I region Hau              | P01600 | 12 kDa                   | 7.36 ± 10    | 17 ± 11       | 16    | (3, 35)             | 24    | (17, 44)                  | 0     | (0, 1) |
| 297     | Ig kappa chain V-I region HK101 (Fragment) | P01601 | 13 kDa                   | 1.09 ± 3.8   | 3.2 ± 4.4     | 0     | (0, 18)             | 0     | (0, 44)                   | 0     | (0, 5) |
| 298     | Ig kappa chain V-I region HK102 (Fragment) | P01602 | 13 kDa                   | 2.69 ± 3.7   | 6.77 ± 7.8    | 0     | (0, 25)             | 0     | (0, 53)                   | 0     | (0, 2) |
| 299     | Ig kappa chain V-I region Ka               | P01603 | 12 kDa                   | 0 ± 0        | 1.57 ± 2.4    | 0     | (0, 9)              | 0     | (0, 43)                   | 0     | (0, 3) |
| 300     | Ig kappa chain V-I region Kue              | P01604 | 12 kDa                   | 1.16 ± 1.4   | 2.79 ± 1.8    | 1     | (0, 6)              | 10    | (0, 38)                   | 0     | (0, 2) |
| 301     | Ig kappa chain V-I region Lay              | P01605 | 12 kDa                   | 0.996 ± 2.1  | 1.55 ± 1.6    | 1     | (1, 7)              | 8     | (8, 32)                   | 0     | (0, 2) |
| 302     | Ig kappa chain V-I region Mev              | P01612 | 12 kDa                   | 2.51 ± 3.8   | 7.3 ± 4.3     | 2     | (0, 15)             | 17    | (0, 50)                   | 1     | (0, 3) |
| 303     | Ig kappa chain V-I region Ni               | P01613 | 12 kDa                   | 6.02 ± 4.5   | 7.55 ± 2.3    | 5     | (0, 21)             | 30    | (0, 30)                   | 1     | (0, 2) |
| 304     | Ig kappa chain V-I region OU               | P01606 | 12 kDa                   | 0.218 ± 0.52 | 0.746 ± 1.8   | 0     | (0, 7)              | 0     | (0, 44)                   | 0     | (0, 2) |

|         |                                             |        | Normalized Total Spectra |             | Total Spectra |       | % Sequence Coverage |       | Number of Unique Peptides |       |        |
|---------|---------------------------------------------|--------|--------------------------|-------------|---------------|-------|---------------------|-------|---------------------------|-------|--------|
| Protein | Accession                                   | MW     | non-GDM                  | GDM         | Median        | Range | Median              | Range | Median                    | Range | Rank   |
| 305     | Ig kappa chain V-I region Rei               | P01607 | 12 kDa                   | 8.81 ± 12   | 4.45 ± 11     | 15    | (3, 36)             | 24    | (17, 42)                  | 0     | (0, 2) |
| 306     | Ig kappa chain V-I region Roy               | P01608 | 12 kDa                   | 15.5 ± 8.3  | 23.7 ± 8.5    | 17    | (4, 39)             | 32    | (17, 43)                  | 1     | (0, 3) |
| 307     | Ig kappa chain V-I region Scw               | P01609 | 12 kDa                   | 6.58 ± 10   | 14.4 ± 11     | 14.5  | (3, 37)             | 17    | (17, 35)                  | 0     | (0, 1) |
| 308     | Ig kappa chain V-I region Walker            | P04431 | 14 kDa                   | 1.36 ± 3.2  | 3.59 ± 4.2    | 0     | (0, 15)             | 0     | (0, 47)                   | 0     | (0, 5) |
| 309     | Ig kappa chain V-I region WAT               | P80362 | 12 kDa                   | 10 ± 11     | 17 ± 12       | 15    | (3, 36)             | 17    | (17, 43)                  | 0     | (0, 1) |
| 310     | Ig kappa chain V-I region Wes               | P01611 | 12 kDa                   | 3.74 ± 3    | 6.06 ± 5.3    | 3     | (0, 17)             | 20    | (0, 48)                   | 1     | (0, 3) |
| 311     | Ig kappa chain V-II region Cum              | P01614 | 13 kDa                   | 3.5 ± 1.8   | 6.26 ± 2.9    | 3     | (1, 12)             | 27    | (11, 54)                  | 0     | (0, 2) |
| 312     | Ig kappa chain V-II region FR               | P01615 | 13 kDa                   | 0.786 ± 1.8 | 2.81 ± 2.3    | 0     | (0, 9)              | 0     | (0, 27)                   | 0     | (0, 2) |
| 313     | Ig kappa chain V-II region GM607 (Fragment) | P06309 | 13 kDa                   | 0.846 ± 1.6 | 2.08 ± 1      | 3     | (1, 6)              | 24    | (11, 33)                  | 0     | (0, 1) |
| 314     | Ig kappa chain V-II region MIL              | P01616 | 12 kDa                   | 0.421 ± 1   | 0.183 ± 0.45  | 0     | (0, 5)              | 0     | (0, 30)                   | 0     | (0, 1) |
| 315     | Ig kappa chain V-II region RPMI 6410        | P06310 | 15 kDa                   | 2.69 ± 2.1  | 5.43 ± 2.7    | 3     | (1, 13)             | 28    | (10, 47)                  | 1     | (0, 3) |
| 316     | Ig kappa chain V-II region TEW              | P01617 | 12 kDa                   | 6.27 ± 3.1  | 8.66 ± 2.7    | 5     | (2, 19)             | 33    | (12, 43)                  | 1     | (0, 2) |
| 317     | Ig kappa chain V-III region B6              | P01619 | 12 kDa                   | 5.29 ± 6.1  | 15.6 ± 6      | 5.5   | (0, 30)             | 26    | (0, 66)                   | 1     | (0, 4) |
| 318     | Ig kappa chain V-III region CLL             | P04207 | 14 kDa                   | 5.26 ± 4.1  | 11.2 ± 5.6    | 4     | (1, 23)             | 21    | (7, 55)                   | 1     | (0, 6) |
| 319     | Ig kappa chain V-III region GOL             | P04206 | 12 kDa                   | 21.8 ± 14   | 38.3 ± 16     | 22    | (5, 76)             | 50    | (31, 77)                  | 0     | (0, 4) |
| 320     | Ig kappa chain V-III region HAH             | P18135 | 14 kDa                   | 10.2 ± 11   | 25.4 ± 15     | 11    | (3, 55)             | 45    | (19, 77)                  | 0     | (0, 1) |

|         |                                            |        | Normalized Total Spectra |            | Total Spectra |       | % Sequence Coverage |       | Number of Unique Peptides |       |        |
|---------|--------------------------------------------|--------|--------------------------|------------|---------------|-------|---------------------|-------|---------------------------|-------|--------|
| Protein | Accession                                  | MW     | non-GDM                  | GDM        | Median        | Range | Median              | Range | Median                    | Range | Rank   |
| 321     | Ig kappa chain V-III region HIC            | P18136 | 14 kDa                   | 7.24 ± 12  | 22.4 ± 20     | 11    | (3, 55)             | 48    | (19, 64)                  | 0     | (0, 1) |
| 322     | Ig kappa chain V-III region IARC/BL41      | P06311 | 14 kDa                   | 1.05 ± 1.6 | 4.24 ± 3.3    | 0     | (0, 11)             | 0     | (0, 39)                   | 0     | (0, 5) |
| 323     | Ig kappa chain V-III region NG9 (Fragment) | P01621 | 11 kDa                   | 4.21 ± 7.1 | 12.3 ± 7.9    | 6.5   | (1, 28)             | 48    | (9, 73)                   | 0     | (0, 1) |
| 324     | Ig kappa chain V-III region POM            | P01624 | 12 kDa                   | 1.11 ± 2.1 | 0.881 ± 2.2   | 2     | (1, 13)             | 8     | (8, 31)                   | 0     | (0, 1) |
| 325     | Ig kappa chain V-III region SIE            | P01620 | 12 kDa                   | 23.7 ± 15  | 41.3 ± 17     | 25    | (6, 83)             | 55    | (38, 66)                  | 0     | (0, 2) |
| 326     | Ig kappa chain V-III region VG (Fragment)  | P04433 | 13 kDa                   | 6.73 ± 6.2 | 9.66 ± 8.4    | 2.5   | (0, 33)             | 18    | (0, 56)                   | 1     | (0, 5) |
| 327     | Ig kappa chain V-III region VH (Fragment)  | P04434 | 13 kDa                   | 4.17 ± 3.3 | 8.51 ± 4      | 3.5   | (1, 18)             | 23    | (8, 41)                   | 1     | (0, 3) |
| 328     | Ig kappa chain V-III region WOL            | P01623 | 12 kDa                   | 23.3 ± 14  | 38.6 ± 15     | 23    | (6, 74)             | 46    | (38, 66)                  | 0     | (0, 2) |
| 329     | Ig kappa chain V-IV region JI              | P06313 | 15 kDa                   | 7.26 ± 1.9 | 11.5 ± 3.9    | 7     | (1, 20)             | 27    | (7, 49)                   | 0     | (0, 2) |
| 330     | Ig kappa chain V-IV region Len             | P01625 | 13 kDa                   | 8.33 ± 2.7 | 15.2 ± 6      | 8     | (1, 30)             | 32    | (8, 48)                   | 1     | (0, 3) |
| 331     | Ig kappa chain V-IV region STH (Fragment)  | P83593 | 12 kDa                   | 2.39 ± 1.2 | 4.59 ± 1.5    | 3     | (0, 10)             | 19    | (0, 28)                   | 0     | (0, 2) |
| 332     | Ig lambda chain V region 4A                | P04211 | 12 kDa                   | 3.91 ± 1.7 | 4.96 ± 2.4    | 3     | (0, 12)             | 14    | (0, 31)                   | 2     | (0, 5) |
| 333     | Ig lambda chain V-I region BL2             | P06316 | 14 kDa                   | 8.89 ± 6.3 | 16.3 ± 2.6    | 11    | (0, 25)             | 19    | (0, 31)                   | 0     | (0, 4) |
| 334     | Ig lambda chain V-I region EPS             | P06888 | 11 kDa                   | 5.3 ± 7    | 12.8 ± 4.2    | 8     | (0, 22)             | 17    | (0, 45)                   | 0     | (0, 2) |
| 335     | Ig lambda chain V-I region HA              | P01700 | 12 kDa                   | 5.96 ± 3.6 | 9.44 ± 5.7    | 5     | (1, 24)             | 35    | (12, 61)                  | 1     | (0, 4) |
| 336     | Ig lambda chain V-I region NEW             | P01701 | 11 kDa                   | 12.1 ± 9.4 | 19.7 ± 5.2    | 11    | (0, 40)             | 24    | (0, 75)                   | 1     | (0, 6) |

|         |                                    |        | Normalized Total Spectra |               | Total Spectra |       | % Sequence Coverage |       | Number of Unique Peptides |       |        |    |
|---------|------------------------------------|--------|--------------------------|---------------|---------------|-------|---------------------|-------|---------------------------|-------|--------|----|
| Protein | Accession                          | MW     | non-GDM                  | GDM           | Median        | Range | Median              | Range | Median                    | Range | Rank   |    |
| 337     | Ig lambda chain V-I region NEWM    | P01703 | 11 kDa                   | 6.99 ± 4.1    | 11.4 ± 5.7    | 5.5   | (2, 26)             | 27    | (17, 42)                  | 2     | (1, 5) |    |
| 338     | Ig lambda chain V-I region NIG-64  | P01702 | 11 kDa                   | 7.94 ± 7      | 15.5 ± 5      | 10    | (0, 27)             | 23    | (0, 32)                   | 0     | (0, 2) |    |
| 339     | Ig lambda chain V-I region VOR     | P01699 | 12 kDa                   | 6.19 ± 4.8    | 10.1 ± 4.7    | 5     | (0, 25)             | 23    | (0, 36)                   | 1     | (0, 2) | 15 |
| 340     | Ig lambda chain V-I region WAH     | P04208 | 12 kDa                   | 18 ± 9.5      | 25 ± 6.5      | 15.5  | (4, 57)             | 38    | (22, 42)                  | 1     | (0, 3) |    |
| 341     | Ig lambda chain V-II region BO     | P01710 | 12 kDa                   | 0.0324 ± 0.11 | 0 ± 0         | 0     | (0, 3)              | 0     | (0, 19)                   | 0     | (0, 2) |    |
| 342     | Ig lambda chain V-II region BOH    | P01706 | 12 kDa                   | 1.71 ± 1.1    | 5.57 ± 3.9    | 3     | (0, 15)             | 7     | (0, 61)                   | 0     | (0, 3) |    |
| 343     | Ig lambda chain V-II region MGC    | P01709 | 12 kDa                   | 1.02 ± 1.9    | 2.65 ± 4.1    | 0     | (0, 16)             | 0     | (0, 14)                   | 0     | (0, 2) |    |
| 344     | Ig lambda chain V-II region NIG-58 | P01713 | 11 kDa                   | 0.21 ± 0.73   | 0 ± 0         | 3     | (0, 14)             | 7     | (0, 16)                   | 0     | (0, 0) |    |
| 345     | Ig lambda chain V-II region NIG-84 | P04209 | 12 kDa                   | 0.531 ± 1.6   | 0.631 ± 1.4   | 0     | (0, 8)              | 0     | (0, 47)                   | 0     | (0, 4) |    |
| 346     | Ig lambda chain V-II region TRO    | P01707 | 12 kDa                   | 3.66 ± 3      | 8.66 ± 8      | 5     | (0, 22)             | 14    | (0, 51)                   | 0     | (0, 1) |    |
| 347     | Ig lambda chain V-II region WIN    | P01712 | 12 kDa                   | 0 ± 0         | 0.978 ± 2.4   | 0     | (0, 16)             | 0     | (0, 16)                   | 0     | (0, 1) |    |
| 348     | Ig lambda chain V-III region LOI   | P80748 | 12 kDa                   | 14.3 ± 6.5    | 20.7 ± 7.1    | 14    | (3, 37)             | 30    | (15, 63)                  | 4     | (2, 8) |    |
| 349     | Ig lambda chain V-III region SH    | P01714 | 11 kDa                   | 9.37 ± 6.5    | 15.2 ± 4.3    | 8.5   | (0, 32)             | 42    | (0, 65)                   | 3     | (0, 7) |    |
| 350     | Ig lambda chain V-IV region Bau    | P01715 | 11 kDa                   | 8.71 ± 7.1    | 17.9 ± 4.3    | 12    | (0, 29)             | 15    | (0, 28)                   | 2     | (0, 4) |    |
| 351     | Ig lambda chain V-IV region Hil    | P01717 | 12 kDa                   | 7.47 ± 4      | 12.4 ± 3.2    | 7.5   | (1, 26)             | 28    | (18, 46)                  | 3     | (1, 6) |    |
| 352     | Ig lambda chain V-IV region MOL    | P06889 | 11 kDa                   | 0.649 ± 1.1   | 2.59 ± 2.3    | 0     | (0, 6)              | 0     | (0, 37)                   | 0     | (0, 2) |    |

|         |                                    |        | Normalized Total Spectra |              | Total Spectra |       | % Sequence Coverage |       | Number of Unique Peptides |       |         |
|---------|------------------------------------|--------|--------------------------|--------------|---------------|-------|---------------------|-------|---------------------------|-------|---------|
| Protein | Accession                          | MW     | non-GDM                  | GDM          | Median        | Range | Median              | Range | Median                    | Range | Rank    |
| 353     | Ig lambda chain V-IV region X      | P01716 | 11 kDa                   | 0.082 ± 0.28 | 0 ± 0         | 0     | (0, 2)              | 0     | (0, 31)                   | 0     | (0, 2)  |
| 354     | Ig lambda chain V-V region DEL     | P01719 | 11 kDa                   | 2.1 ± 4.4    | 4.38 ± 4.5    | 0     | (0, 19)             | 0     | (0, 65)                   | 0     | (0, 7)  |
| 355     | Ig lambda chain V-VI region AR     | P01721 | 12 kDa                   | 0.158 ± 0.55 | 0 ± 0         | 0     | (0, 5)              | 0     | (0, 27)                   | 0     | (0, 1)  |
| 356     | Ig lambda chain V-VI region EB4    | P06319 | 14 kDa                   | 0.516 ± 0.83 | 0.33 ± 0.81   | 0     | (0, 6)              | 0     | (0, 40)                   | 0     | (0, 2)  |
| 357     | Ig lambda chain V-VI region NIG-48 | P01722 | 12 kDa                   | 0 ± 0        | 0.371 ± 0.91  | 0     | (0, 3)              | 0     | (0, 23)                   | 0     | (0, 2)  |
| 358     | Ig lambda chain V-VI region SUT    | P06317 | 12 kDa                   | 3.08 ± 3.6   | 3.43 ± 3.3    | 2     | (0, 13)             | 6     | (0, 35)                   | 1.5   | (0, 3)  |
| 359     | Ig lambda chain V-VI region WLT    | P06318 | 12 kDa                   | 0.128 ± 0.3  | 0.33 ± 0.81   | 0     | (0, 3)              | 0     | (0, 25)                   | 0     | (0, 1)  |
| 360     | Ig lambda-1 chain C regions        | P0CG04 | 11 kDa                   | 112 ± 52     | 165 ± 25      | 111.5 | (33, 338)           | 69    | (51, 96)                  | 0     | (0, 1)  |
| 361     | Ig lambda-2 chain C regions        | P0CG05 | 11 kDa                   | 142 ± 49     | 193 ± 34      | 142.5 | (52, 359)           | 82    | (51, 96)                  | 0     | (0, 2)  |
| 362     | Ig lambda-3 chain C regions        | P0CG06 | 11 kDa                   | 145 ± 50     | 197 ± 34      | 146.5 | (52, 361)           | 87    | (51, 96)                  | 2     | (0, 4)  |
| 363     | Ig lambda-6 chain C region         | P0CF74 | 11 kDa                   | 110 ± 47     | 149 ± 21      | 113.5 | (46, 321)           | 49    | (32, 70)                  | 0     | (0, 1)  |
| 364     | Ig lambda-7 chain C region         | A0M8Q6 | 11 kDa                   | 97 ± 37      | 124 ± 21      | 94    | (44, 270)           | 49    | (32, 74)                  | 1     | (0, 3)  |
| 365     | Ig mu chain C region               | P01871 | 49 kDa                   | 60.3 ± 37    | 88.3 ± 48     | 60    | (7, 157)            | 38    | (14, 49)                  | 7     | (2, 11) |
| 366     | Ig mu heavy chain disease protein  | P04220 | 43 kDa                   | 33.9 ± 22    | 55.3 ± 32     | 31.5  | (3, 102)            | 31    | (10, 44)                  | 1     | (0, 6)  |
| 367     | IgGFc-binding protein              | Q9Y6R7 | 572 kDa                  | 1.68 ± 4.4   | 0.377 ± 0.74  | 0     | (0, 21)             | 0     | (0, 3)                    | 0     | (0, 14) |
| 368     | Immunoglobulin J chain             | P01591 | 18 kDa                   | 138 ± 120    | 248 ± 140     | 105.5 | (47, 757)           | 66    | (42, 76)                  | 10.5  | (6, 26) |



|         |                                              |        |         | Normalized Total Spectra |              | Total Spectra |           | % Sequence Coverage |          | Number of Unique Peptides |         |  |
|---------|----------------------------------------------|--------|---------|--------------------------|--------------|---------------|-----------|---------------------|----------|---------------------------|---------|--|
| Protein | Accession                                    | MW     | non-GDM | GDM                      | Median       | Range         | Median    | Range               | Median   | Range                     | Rank    |  |
| 369     | Immunoglobulin lambda-like polypeptide 1     | P15814 | 23 kDa  | 1.69 ± 2                 | 2.98 ± 2.1   | 1             | (0, 9)    | 7                   | (0, 23)  | 1                         | (0, 4)  |  |
| 370     | Insulin-like growth factor-binding protein 2 | P18065 | 35 kDa  | 12.8 ± 10                | 1.96 ± 2.6   | 9             | (0, 28)   | 18                  | (0, 45)  | 5.5                       | (0, 13) |  |
| 371     | Integrin beta-like protein 1                 | O95965 | 54 kDa  | 0.372 ± 0.84             | 0.14 ± 0.34  | 0             | (0, 4)    | 0                   | (0, 9)   | 0                         | (0, 4)  |  |
| 372     | Inter-alpha-trypsin inhibitor heavy chain H4 | Q14624 | 103 kDa | 0.526 ± 1.1              | 0.171 ± 0.27 | 0             | (0, 5)    | 0                   | (0, 4)   | 0                         | (0, 4)  |  |
| 373     | IST1 homolog                                 | P53990 | 40 kDa  | 0.048 ± 0.17             | 0 ± 0        | 0             | (0, 2)    | 0                   | (0, 6)   | 0                         | (0, 2)  |  |
| 374     | Junction plakoglobin                         | P14923 | 82 kDa  | 0 ± 0                    | 0.911 ± 1.8  | 0             | (0, 7)    | 0                   | (0, 8)   | 0                         | (0, 5)  |  |
| 375     | Kallikrein-11                                | Q9UBX7 | 31 kDa  | 0 ± 0                    | 0.4 ± 0.81   | 0             | (0, 3)    | 0                   | (0, 6)   | 0                         | (0, 2)  |  |
| 376     | Kallikrein-6                                 | Q92876 | 27 kDa  | 2.94 ± 2.3               | 2.25 ± 1.7   | 2             | (0, 9)    | 10                  | (0, 39)  | 2                         | (0, 7)  |  |
| 377     | Kappa-casein                                 | P07498 | 20 kDa  | 391 ± 130                | 193 ± 180    | 346.5         | (24, 570) | 55                  | (34, 60) | 30                        | (8, 49) |  |
| 378     | Keratin, type I cuticular Ha1                | Q15323 | 47 kDa  | 0.082 ± 0.28             | 2.17 ± 5.3   | 1             | (0, 18)   | 2                   | (0, 15)  | 0                         | (0, 0)  |  |
| 379     | Keratin, type I cuticular Ha2                | Q14532 | 50 kDa  | 0.594 ± 1.6              | 1.4 ± 3      | 1             | (0, 11)   | 2                   | (0, 4)   | 0                         | (0, 0)  |  |
| 380     | Keratin, type I cuticular Ha3-II             | Q14525 | 46 kDa  | 0.703 ± 1.7              | 2.36 ± 5.8   | 1             | (0, 20)   | 2                   | (0, 16)  | 0                         | (0, 2)  |  |
| 381     | Keratin, type I cuticular Ha4                | O76011 | 49 kDa  | 0 ± 0                    | 2.05 ± 5     | 0             | (0, 18)   | 0                   | (0, 9)   | 0                         | (0, 0)  |  |
| 382     | Keratin, type I cuticular Ha5                | Q92764 | 50 kDa  | 0 ± 0                    | 0.498 ± 1.2  | 1             | (0, 11)   | 2                   | (0, 7)   | 0                         | (0, 1)  |  |
| 383     | Keratin, type I cuticular Ha7                | O76014 | 50 kDa  | 0 ± 0                    | 0.745 ± 1.8  | 1             | (0, 11)   | 2                   | (0, 4)   | 0                         | (0, 0)  |  |
| 384     | Keratin, type I cytoskeletal 14              | P02533 | 52 kDa  | 12.5 ± 8.5               | 8.73 ± 8.6   | 12.5          | (4, 39)   | 9                   | (2, 24)  | 0                         | (0, 3)  |  |

|         |                                      |        | Normalized Total Spectra |              | Total Spectra |       | % Sequence Coverage |       | Number of Unique Peptides |       |         |
|---------|--------------------------------------|--------|--------------------------|--------------|---------------|-------|---------------------|-------|---------------------------|-------|---------|
| Protein | Accession                            | MW     | non-GDM                  | GDM          | Median        | Range | Median              | Range | Median                    | Range | Rank    |
| 385     | Keratin, type I cytoskeletal 15      | P19012 | 49 kDa                   | 4.11 ± 5.1   | 3.33 ± 3.7    | 5     | (0, 19)             | 5     | (0, 10)                   | 0     | (0, 1)  |
| 386     | Keratin, type I cytoskeletal 16      | P08779 | 51 kDa                   | 13.6 ± 7.7   | 10.2 ± 5.7    | 12    | (4, 40)             | 7     | (2, 24)                   | 0     | (0, 5)  |
| 387     | Keratin, type I cytoskeletal 19      | P08727 | 44 kDa                   | 2.53 ± 4.9   | 2.85 ± 3.4    | 4.5   | (0, 18)             | 5     | (0, 11)                   | 0     | (0, 1)  |
| 388     | Keratin, type I cytoskeletal 20      | P35900 | 48 kDa                   | 0 ± 0        | 0.493 ± 1.2   | 0     | (0, 6)              | 0     | (0, 4)                    | 0     | (0, 0)  |
| 389     | Keratin, type I cytoskeletal 24      | Q2M2I5 | 55 kDa                   | 1.62 ± 1.8   | 2.05 ± 2.1    | 4     | (0, 18)             | 2     | (0, 3)                    | 0     | (0, 0)  |
| 390     | Keratin, type I cytoskeletal 28      | Q7Z3Y7 | 51 kDa                   | 0.815 ± 2.8  | 0 ± 0         | 12.5  | (3, 39)             | 4     | (3, 7)                    | 0     | (0, 1)  |
| 391     | Keratin, type I cytoskeletal 9       | P35527 | 62 kDa                   | 25.1 ± 8.4   | 34.2 ± 17     | 31    | (7, 61)             | 34    | (7, 58)                   | 14    | (3, 24) |
| 392     | Keratin, type II cuticular Hb1       | Q14533 | 55 kDa                   | 0.348 ± 1    | 2.23 ± 5.5    | 0     | (0, 20)             | 0     | (0, 16)                   | 0     | (0, 1)  |
| 393     | Keratin, type II cuticular Hb2       | Q9NSB4 | 57 kDa                   | 0 ± 0        | 0.93 ± 2.3    | 0     | (0, 8)              | 0     | (0, 5)                    | 0     | (0, 0)  |
| 394     | Keratin, type II cytoskeletal 1      | P04264 | 66 kDa                   | 59.6 ± 17    | 75 ± 31       | 63.5  | (20, 145)           | 42    | (17, 54)                  | 21    | (7, 30) |
| 395     | Keratin, type II cytoskeletal 1b     | Q7Z794 | 62 kDa                   | 0.68 ± 0.92  | 2.04 ± 3.4    | 3     | (1, 11)             | 3     | (2, 7)                    | 0     | (0, 1)  |
| 396     | Keratin, type II cytoskeletal 2 oral | Q01546 | 66 kDa                   | 0 ± 0        | 0.44 ± 1.1    | 10    | (0, 19)             | 4     | (0, 7)                    | 0     | (0, 0)  |
| 397     | Keratin, type II cytoskeletal 3      | P12035 | 64 kDa                   | 0.834 ± 1.7  | 2.12 ± 2.5    | 6     | (0, 15)             | 3     | (0, 7)                    | 0     | (0, 1)  |
| 398     | Keratin, type II cytoskeletal 4      | P19013 | 57 kDa                   | 0.069 ± 0.24 | 0.454 ± 0.71  | 3     | (0, 9)              | 2     | (0, 5)                    | 0     | (0, 0)  |
| 399     | Keratin, type II cytoskeletal 5      | P13647 | 62 kDa                   | 8.65 ± 4     | 17.6 ± 12     | 10    | (2, 42)             | 10    | (3, 29)                   | 3     | (0, 12) |
| 400     | Keratin, type II cytoskeletal 6A     | P02538 | 60 kDa                   | 4.3 ± 6.3    | 11.3 ± 13     | 11    | (0, 36)             | 9     | (0, 25)                   | 0     | (0, 1)  |

|         |                                  |        | Normalized Total Spectra |               | Total Spectra |       | % Sequence Coverage |       | Number of Unique Peptides |       |           |    |
|---------|----------------------------------|--------|--------------------------|---------------|---------------|-------|---------------------|-------|---------------------------|-------|-----------|----|
| Protein | Accession                        | MW     | non-GDM                  | GDM           | Median        | Range | Median              | Range | Median                    | Range | Rank      |    |
| 401     | Keratin, type II cytoskeletal 6C | P48668 | 60 kDa                   | 5.6 ± 5.8     | 12.9 ± 12     | 11    | (0, 36)             | 9     | (0, 27)                   | 0     | (0, 1)    |    |
| 402     | Keratin, type II cytoskeletal 7  | P08729 | 51 kDa                   | 0.161 ± 0.35  | 0.434 ± 1.1   | 0     | (0, 4)              | 0     | (0, 7)                    | 0     | (0, 1)    |    |
| 403     | Keratin, type II cytoskeletal 71 | Q3SY84 | 57 kDa                   | 0 ± 0         | 0.32 ± 0.78   | 0     | (0, 4)              | 0     | (0, 4)                    | 0     | (0, 0)    |    |
| 404     | Keratin, type II cytoskeletal 72 | Q14CN4 | 56 kDa                   | 0.143 ± 0.36  | 0.84 ± 1.1    | 0     | (0, 4)              | 0     | (0, 4)                    | 0     | (0, 1)    |    |
| 405     | Keratin, type II cytoskeletal 73 | Q86Y46 | 59 kDa                   | 0 ± 0         | 0.508 ± 0.83  | 0     | (0, 5)              | 0     | (0, 6)                    | 0     | (0, 0)    |    |
| 406     | Keratin, type II cytoskeletal 74 | Q7RTS7 | 58 kDa                   | 0 ± 0         | 0.0672 ± 0.16 | 0     | (0, 6)              | 0     | (0, 5)                    | 0     | (0, 0)    |    |
| 407     | Keratin, type II cytoskeletal 75 | O95678 | 60 kDa                   | 1.29 ± 2      | 3.7 ± 5.8     | 3     | (0, 18)             | 4     | (0, 10)                   | 0     | (0, 2)    |    |
| 408     | Keratin, type II cytoskeletal 79 | Q5XKE5 | 58 kDa                   | 0.0601 ± 0.21 | 0 ± 0         | 3     | (0, 16)             | 4     | (0, 12)                   | 0     | (0, 0)    |    |
| 409     | Keratin, type II cytoskeletal 8  | P05787 | 54 kDa                   | 0.192 ± 0.67  | 1.44 ± 2.7    | 4.5   | (0, 18)             | 2     | (0, 7)                    | 0     | (0, 1)    |    |
| 410     | Kin of IRRE-like protein 3       | Q8IZU9 | 85 kDa                   | 0.24 ± 0.41   | 0.898 ± 1.1   | 0     | (0, 4)              | 0     | (0, 2)                    | 0     | (0, 2)    |    |
| 411     | Kininogen-1                      | P01042 | 72 kDa                   | 8.05 ± 3      | 4.35 ± 2      | 7     | (1, 11)             | 10    | (2, 18)                   | 5     | (1, 10)   | 13 |
| 412     | Kunitz-type protease inhibitor 1 | O43278 | 58 kDa                   | 2.25 ± 1.4    | 1.4 ± 0.94    | 2     | (0, 6)              | 3     | (0, 9)                    | 2     | (0, 5)    |    |
| 413     | Lactadherin                      | Q08431 | 43 kDa                   | 38.3 ± 18     | 38.9 ± 13     | 32    | (14, 100)           | 48    | (30, 71)                  | 15    | (9, 28)   |    |
| 414     | Lactoperoxidase                  | P22079 | 80 kDa                   | 0.553 ± 1.1   | 0 ± 0         | 0     | (0, 4)              | 0     | (0, 6)                    | 0     | (0, 4)    |    |
| 415     | Lactotransferrin                 | P02788 | 78 kDa                   | 1050 ± 250    | 973 ± 310     | 1049  | (562, 1817)         | 81    | (75, 88)                  | 104   | (73, 134) |    |
| 416     | Laminin subunit beta-4           | A4D0S4 | 194 kDa                  | 0.0632 ± 0.22 | 0.0677 ± 0.17 | 0     | (0, 2)              | 0     | (0, 1)                    | 0     | (0, 2)    |    |

|         |                                                          |        | Normalized Total Spectra |               | Total Spectra |       | % Sequence Coverage |       | Number of Unique Peptides |       |         |
|---------|----------------------------------------------------------|--------|--------------------------|---------------|---------------|-------|---------------------|-------|---------------------------|-------|---------|
| Protein | Accession                                                | MW     | non-GDM                  | GDM           | Median        | Range | Median              | Range | Median                    | Range | Rank    |
| 417     | Latent-transforming growth factor beta-binding protein 1 | Q14766 | 187 kDa                  | 0.515 ± 0.58  | 0.69 ± 0.56   | 1     | (0, 3)              | 1     | (0, 2)                    | 1     | (0, 2)  |
| 418     | Latent-transforming growth factor beta-binding protein 3 | Q9NS15 | 139 kDa                  | 0.0977 ± 0.34 | 0 ± 0         | 0     | (0, 2)              | 0     | (0, 2)                    | 0     | (0, 2)  |
| 419     | Leucine-rich alpha-2-glycoprotein                        | P02750 | 38 kDa                   | 72.7 ± 15     | 58.9 ± 26     | 67    | (31, 104)           | 46    | (32, 52)                  | 13    | (9, 16) |
| 420     | Leucine-rich repeat transmembrane neuronal protein 2     | O43300 | 59 kDa                   | 0.102 ± 0.26  | 0 ± 0         | 0     | (0, 2)              | 0     | (0, 3)                    | 0     | (0, 2)  |
| 421     | Leucine-rich repeat-containing protein 15                | Q8TF66 | 64 kDa                   | 0 ± 0         | 0.435 ± 1.1   | 0     | (0, 4)              | 0     | (0, 4)                    | 0     | (0, 3)  |
| 422     | LIM and SH3 domain protein 1                             | Q14847 | 30 kDa                   | 0.352 ± 0.93  | 0.0684 ± 0.17 | 0     | (0, 5)              | 0     | (0, 13)                   | 0     | (0, 4)  |
| 423     | Lipolysis-stimulated lipoprotein receptor                | Q86X29 | 71 kDa                   | 1.41 ± 1.2    | 0.986 ± 1.3   | 1     | (0, 7)              | 2     | (0, 8)                    | 1     | (0, 4)  |
| 424     | Lipoprotein lipase                                       | P06858 | 53 kDa                   | 31.6 ± 14     | 20.2 ± 21     | 28.5  | (0, 74)             | 33    | (0, 43)                   | 12    | (0, 22) |
| 425     | Long-chain-fatty-acid--CoA ligase 4                      | O60488 | 79 kDa                   | 0.144 ± 0.5   | 0.136 ± 0.21  | 0     | (0, 3)              | 0     | (0, 4)                    | 0     | (0, 2)  |
| 426     | Ly6/PLAUR domain-containing protein 3                    | O95274 | 36 kDa                   | 0.991 ± 1.1   | 1.61 ± 1.5    | 1     | (0, 5)              | 4     | (0, 15)                   | 1     | (0, 4)  |
| 427     | Lymphocyte antigen 6D                                    | Q14210 | 13 kDa                   | 0.667 ± 1.2   | 0.62 ± 1      | 0     | (0, 5)              | 0     | (0, 23)                   | 0     | (0, 3)  |
| 428     | Lysosomal alpha-glucosidase                              | P10253 | 105 kDa                  | 0.425 ± 0.71  | 0.337 ± 0.54  | 0     | (0, 3)              | 0     | (0, 3)                    | 0     | (0, 2)  |
| 429     | Lysosome-associated membrane glycoprotein 2              | P13473 | 45 kDa                   | 0.676 ± 1.3   | 1.22 ± 1.1    | 0     | (0, 5)              | 0     | (0, 7)                    | 0     | (0, 3)  |
| 430     | Lysozyme C                                               | P61626 | 17 kDa                   | 5.98 ± 5.6    | 7.32 ± 5.5    | 5     | (0, 30)             | 29    | (0, 49)                   | 3     | (0, 9)  |
| 431     | Macrophage colony-stimulating factor 1                   | P09603 | 60 kDa                   | 1.17 ± 1.5    | 0.269 ± 0.66  | 0     | (0, 5)              | 0     | (0, 5)                    | 0     | (0, 2)  |
| 432     | Macrophage mannose receptor 1                            | P22897 | 166 kDa                  | 7.45 ± 8.2    | 2.93 ± 4.6    | 6     | (0, 93)             | 4     | (0, 35)                   | 5.5   | (0, 47) |

|         |                                        |        | Normalized Total Spectra |               | Total Spectra |       | % Sequence Coverage |       | Number of Unique Peptides |       |         |    |
|---------|----------------------------------------|--------|--------------------------|---------------|---------------|-------|---------------------|-------|---------------------------|-------|---------|----|
| Protein | Accession                              | MW     | non-GDM                  | GDM           | Median        | Range | Median              | Range | Median                    | Range | Rank    |    |
| 433     | Macrophage migration inhibitory factor | P14174 | 12 kDa                   | 0.833 ± 0.58  | 0.267 ± 0.49  | 0.5   | (0, 2)              | 0     | (0, 17)                   | 0.5   | (0, 2)  | 22 |
| 434     | Macrophage-capping protein             | P40121 | 38 kDa                   | 0.0705 ± 0.24 | 0.252 ± 0.45  | 0     | (0, 2)              | 0     | (0, 7)                    | 0     | (0, 2)  |    |
| 435     | Mammaglobin-A                          | Q13296 | 10 kDa                   | 1.11 ± 1.8    | 4.58 ± 2.7    | 1     | (0, 12)             | 9     | (0, 23)                   | 1     | (0, 2)  |    |
| 436     | MARCKS-related protein                 | P49006 | 20 kDa                   | 1.43 ± 1.3    | 0.702 ± 0.78  | 1     | (0, 3)              | 7     | (0, 14)                   | 1     | (0, 2)  |    |
| 437     | Matrilin-3                             | O15232 | 53 kDa                   | 5.07 ± 3.1    | 2.77 ± 4.5    | 3.5   | (0, 14)             | 7     | (0, 27)                   | 3     | (0, 10) |    |
| 438     | Matrilysin                             | P09237 | 30 kDa                   | 0.0802 ± 0.28 | 0.185 ± 0.45  | 0     | (0, 2)              | 0     | (0, 6)                    | 0     | (0, 1)  |    |
| 439     | Matrix Gla protein                     | P08493 | 12 kDa                   | 0.244 ± 0.46  | 0.445 ± 0.53  | 0     | (0, 2)              | 0     | (0, 19)                   | 0     | (0, 2)  |    |
| 440     | Melanotransferrin                      | P08582 | 80 kDa                   | 0 ± 0         | 0.601 ± 1.3   | 0     | (0, 5)              | 0     | (0, 9)                    | 0     | (0, 5)  |    |
| 441     | Metalloproteinase inhibitor 1          | P01033 | 23 kDa                   | 2.98 ± 2.3    | 2.61 ± 3.5    | 3     | (0, 11)             | 13    | (0, 52)                   | 2.5   | (0, 9)  |    |
| 442     | Microfibrillar-associated protein 2    | P55001 | 21 kDa                   | 3.36 ± 1.8    | 2.18 ± 2      | 2.5   | (0, 9)              | 5     | (0, 15)                   | 1.5   | (0, 4)  |    |
| 443     | Moesin                                 | P26038 | 68 kDa                   | 0.529 ± 0.79  | 0.0672 ± 0.16 | 0     | (0, 3)              | 0     | (0, 5)                    | 0     | (0, 2)  |    |
| 444     | Monocyte differentiation antigen CD14  | P08571 | 40 kDa                   | 45.3 ± 13     | 33.8 ± 27     | 40    | (4, 75)             | 49    | (9, 62)                   | 14    | (3, 16) |    |
| 445     | Msx2-interacting protein               | Q96T58 | 402 kDa                  | 0.535 ± 0.55  | 0.376 ± 0.33  | 0     | (0, 2)              | 0     | (0, 1)                    | 0     | (0, 2)  |    |
| 446     | Mucin-1                                | P15941 | 122 kDa                  | 18.3 ± 5.1    | 11.8 ± 4.5    | 16    | (8, 30)             | 5     | (2, 7)                    | 5     | (3, 7)  | 11 |
| 447     | Mucin-16                               | Q8WXI7 | 2353 kDa                 | 0 ± 0         | 0.674 ± 1.7   | 0     | (0, 5)              | 0     | (0, 0)                    | 0     | (0, 5)  |    |
| 448     | Mucin-4                                | Q99102 | 232 kDa                  | 4.6 ± 3.4     | 2.33 ± 1.5    | 3     | (0, 12)             | 1     | (0, 6)                    | 3     | (0, 9)  |    |

|         |                                                     |        | Normalized Total Spectra |              | Total Spectra |       | % Sequence Coverage |       | Number of Unique Peptides |       |         |
|---------|-----------------------------------------------------|--------|--------------------------|--------------|---------------|-------|---------------------|-------|---------------------------|-------|---------|
| Protein | Accession                                           | MW     | non-GDM                  | GDM          | Median        | Range | Median              | Range | Median                    | Range | Rank    |
| 449     | Mucin-5B                                            | Q9HC84 | 596 kDa                  | 0.864 ± 2.9  | 6.91 ± 10     | 0     | (0, 36)             | 0     | (0, 5)                    | 0     | (0, 20) |
| 450     | Mucin-6                                             | Q6W4X9 | 257 kDa                  | 0 ± 0        | 1.25 ± 1.7    | 0     | (0, 5)              | 0     | (0, 2)                    | 0     | (0, 4)  |
| 451     | Mucin-like protein 1                                | Q96DR8 | 9 kDa                    | 4.89 ± 4.5   | 5.48 ± 3.4    | 5     | (0, 12)             | 10    | (0, 18)                   | 1     | (0, 2)  |
| 452     | Multiple coagulation factor deficiency protein 2    | Q8NI22 | 16 kDa                   | 0 ± 0        | 0.144 ± 0.35  | 0     | (0, 2)              | 0     | (0, 23)                   | 0     | (0, 2)  |
| 453     | Myeloperoxidase                                     | P05164 | 84 kDa                   | 0.945 ± 2.6  | 2.04 ± 2.8    | 0     | (0, 14)             | 0     | (0, 16)                   | 0     | (0, 9)  |
| 454     | Myosin light chain 6B                               | P14649 | 23 kDa                   | 0.384 ± 0.43 | 0.304 ± 0.74  | 0     | (0, 2)              | 0     | (0, 10)                   | 0     | (0, 1)  |
| 455     | Myosin light polypeptide 6                          | P60660 | 17 kDa                   | 1.07 ± 0.97  | 0.537 ± 0.97  | 1     | (0, 4)              | 6     | (0, 25)                   | 0     | (0, 2)  |
| 456     | Myosin-9                                            | P35579 | 227 kDa                  | 0.141 ± 0.36 | 0.197 ± 0.34  | 0     | (0, 3)              | 0     | (0, 2)                    | 0     | (0, 3)  |
| 457     | Myristoylated alanine-rich C-kinase substrate       | P29966 | 32 kDa                   | 4.52 ± 4.5   | 0.594 ± 1.2   | 2     | (0, 14)             | 7     | (0, 31)                   | 2     | (0, 7)  |
| 458     | N(4)-(beta-N-acetylglucosaminyl)-L-asparaginase     | P20933 | 37 kDa                   | 0.134 ± 0.36 | 0.391 ± 0.69  | 0     | (0, 3)              | 0     | (0, 7)                    | 0     | (0, 2)  |
| 459     | N(G),N(G)-dimethylarginine dimethylaminohydrolase 1 | O94760 | 31 kDa                   | 0.14 ± 0.26  | 0 ± 0         | 0     | (0, 2)              | 0     | (0, 7)                    | 0     | (0, 2)  |
| 460     | Na(+)/H(+) exchange regulatory cofactor NHE-RF1     | O14745 | 39 kDa                   | 7.1 ± 5.4    | 1.18 ± 1      | 3     | (0, 14)             | 9     | (0, 37)                   | 3     | (0, 10) |
| 461     | Nephronectin                                        | Q6UXI9 | 62 kDa                   | 0.829 ± 1.1  | 0.209 ± 0.51  | 0     | (0, 4)              | 0     | (0, 9)                    | 0     | (0, 4)  |
| 462     | Neuroendocrine secretory protein 55                 | O95467 | 28 kDa                   | 0 ± 0        | 0.702 ± 1.7   | 0     | (0, 5)              | 0     | (0, 11)                   | 0     | (0, 3)  |
| 463     | Neuropilin-1                                        | O14786 | 103 kDa                  | 0.101 ± 0.25 | 1.23 ± 2.6    | 0     | (0, 9)              | 0     | (0, 12)                   | 0     | (0, 8)  |
| 464     | Neuroserpin                                         | Q99574 | 46 kDa                   | 1.01 ± 1.1   | 1.56 ± 1.3    | 1     | (0, 4)              | 2     | (0, 10)                   | 1     | (0, 4)  |

|         |                                              |        | Normalized Total Spectra |               | Total Spectra |       | % Sequence Coverage |       | Number of Unique Peptides |       |         |
|---------|----------------------------------------------|--------|--------------------------|---------------|---------------|-------|---------------------|-------|---------------------------|-------|---------|
| Protein | Accession                                    | MW     | non-GDM                  | GDM           | Median        | Range | Median              | Range | Median                    | Range | Rank    |
| 465     | Neutral alpha-glucosidase AB                 | Q14697 | 107 kDa                  | 2.14 ± 1.8    | 0.725 ± 1.2   | 1     | (0, 8)              | 2     | (0, 8)                    | 1     | (0, 7)  |
| 466     | Neutrophil defensin 1                        | P59665 | 10 kDa                   | 4.57 ± 1.5    | 6.74 ± 1.9    | 4.5   | (0, 11)             | 19    | (0, 19)                   | 0     | (0, 0)  |
| 467     | Neutrophil defensin 3                        | P59666 | 10 kDa                   | 4.57 ± 1.5    | 6.74 ± 1.9    | 4.5   | (0, 11)             | 19    | (0, 19)                   | 0     | (0, 0)  |
| 468     | Neutrophil elastase                          | P08246 | 29 kDa                   | 0.719 ± 2.3   | 0.0612 ± 0.15 | 0     | (0, 11)             | 0     | (0, 23)                   | 0     | (0, 5)  |
| 469     | Nuclear receptor coactivator 2               | Q15596 | 159 kDa                  | 0 ± 0         | 0.36 ± 0.44   | 0     | (0, 2)              | 0     | (0, 1)                    | 0     | (0, 2)  |
| 470     | Nuclease-sensitive element-binding protein 1 | P67809 | 36 kDa                   | 0.159 ± 0.33  | 0 ± 0         | 0     | (0, 3)              | 0     | (0, 12)                   | 0     | (0, 2)  |
| 471     | Nucleobindin-1                               | Q02818 | 54 kDa                   | 26.7 ± 11     | 11.6 ± 13     | 21    | (0, 43)             | 37    | (0, 59)                   | 14    | (0, 22) |
| 472     | Nucleobindin-2                               | P80303 | 50 kDa                   | 18.5 ± 12     | 7.89 ± 11     | 12.5  | (0, 39)             | 24    | (0, 50)                   | 8     | (0, 16) |
| 473     | Nucleotide exchange factor SIL1              | Q9H173 | 52 kDa                   | 2.2 ± 1.6     | 0.866 ± 0.99  | 2     | (0, 4)              | 4     | (0, 11)                   | 2     | (0, 3)  |
| 474     | Olfactomedin-4                               | Q6UX06 | 57 kDa                   | 2.67 ± 4.3    | 4.08 ± 5      | 0     | (0, 20)             | 0     | (0, 24)                   | 0     | (0, 12) |
| 475     | Olfactomedin-like protein 3                  | Q9NRN5 | 46 kDa                   | 0.0458 ± 0.16 | 0 ± 0         | 0     | (0, 1)              | 0     | (0, 7)                    | 0     | (0, 1)  |
| 476     | Osteopontin                                  | P10451 | 35 kDa                   | 89.4 ± 50     | 65.6 ± 67     | 84    | (6, 176)            | 43    | (13, 63)                  | 16    | (4, 27) |
| 477     | Parathyroid hormone-related protein          | P12272 | 20 kDa                   | 0.0667 ± 0.23 | 0 ± 0         | 0     | (0, 4)              | 0     | (0, 24)                   | 0     | (0, 3)  |
| 478     | Peptidyl-prolyl cis-trans isomerase B        | P23284 | 24 kDa                   | 1.57 ± 2      | 1.55 ± 2.4    | 1     | (0, 12)             | 4     | (0, 30)                   | 1     | (0, 7)  |
| 479     | Peptidyl-prolyl cis-trans isomerase C        | P45877 | 23 kDa                   | 1.44 ± 1.3    | 0.622 ± 1.1   | 1     | (0, 5)              | 6     | (0, 15)                   | 1     | (0, 3)  |
| 480     | Perilipin-2                                  | Q99541 | 48 kDa                   | 5.92 ± 5.7    | 1.34 ± 1.5    | 3     | (0, 22)             | 7     | (0, 40)                   | 3     | (0, 12) |

|         |                                                       |        | Normalized Total Spectra |              | Total Spectra |       | % Sequence Coverage |       | Number of Unique Peptides |       |           |
|---------|-------------------------------------------------------|--------|--------------------------|--------------|---------------|-------|---------------------|-------|---------------------------|-------|-----------|
| Protein | Accession                                             | MW     | non-GDM                  | GDM          | Median        | Range | Median              | Range | Median                    | Range | Rank      |
| 481     | Perilipin-3                                           | O60664 | 47 kDa                   | 3.65 ± 6.8   | 0.346 ± 0.85  | 1     | (0, 23)             | 3     | (0, 45)                   | 1     | (0, 13)   |
| 482     | Peroxiredoxin-1                                       | Q06830 | 22 kDa                   | 2.77 ± 2     | 2.38 ± 1.3    | 2     | (0, 8)              | 11    | (0, 38)                   | 1     | (0, 5)    |
| 483     | Peroxiredoxin-2                                       | P32119 | 22 kDa                   | 1.95 ± 1.7   | 0.228 ± 0.36  | 1     | (0, 5)              | 4     | (0, 24)                   | 0     | (0, 4)    |
| 484     | Peroxiredoxin-4                                       | Q13162 | 31 kDa                   | 0 ± 0        | 0.715 ± 1     | 0     | (0, 4)              | 0     | (0, 11)                   | 0     | (0, 0)    |
| 485     | Peroxiredoxin-5, mitochondrial                        | P30044 | 22 kDa                   | 0.146 ± 0.34 | 0 ± 0         | 0     | (0, 2)              | 0     | (0, 9)                    | 0     | (0, 2)    |
| 486     | Phosphatidylethanolamine-binding protein 1            | P30086 | 21 kDa                   | 1.95 ± 1.4   | 0.707 ± 1.1   | 1     | (0, 6)              | 8     | (0, 32)                   | 1     | (0, 5)    |
| 487     | Phosphatidylethanolamine-binding protein 4            | Q96S96 | 26 kDa                   | 0.19 ± 0.32  | 0.233 ± 0.37  | 0     | (0, 2)              | 0     | (0, 7)                    | 0     | (0, 2)    |
| 488     | Plasma protease C1 inhibitor                          | P05155 | 55 kDa                   | 0.947 ± 0.84 | 0.845 ± 1.1   | 1     | (0, 6)              | 2     | (0, 12)                   | 1     | (0, 5)    |
| 489     | Plasminogen                                           | P00747 | 91 kDa                   | 7.41 ± 5.7   | 8.25 ± 4.9    | 7     | (0, 25)             | 7     | (0, 27)                   | 5     | (0, 17)   |
| 490     | Plasminogen activator inhibitor 1 RNA-binding protein | Q8NC51 | 45 kDa                   | 0.233 ± 0.38 | 0.0684 ± 0.17 | 0     | (0, 3)              | 0     | (0, 9)                    | 0     | (0, 3)    |
| 491     | Platelet glycoprotein 4                               | P16671 | 53 kDa                   | 5.84 ± 3     | 3.2 ± 1.4     | 4     | (1, 11)             | 8     | (0, 22)                   | 3.5   | (1, 8)    |
| 492     | Platelet-derived growth factor C                      | Q9NRA1 | 39 kDa                   | 0.123 ± 0.43 | 0 ± 0         | 0     | (0, 1)              | 0     | (0, 5)                    | 0     | (0, 1)    |
| 493     | Podocalyxin                                           | O00592 | 59 kDa                   | 5.18 ± 1.8   | 3.86 ± 2.1    | 4.5   | (0, 8)              | 6     | (0, 10)                   | 3     | (0, 6)    |
| 494     | Podocalyxin-like protein 2                            | Q9NZ53 | 65 kDa                   | 0.326 ± 0.53 | 0.433 ± 0.67  | 0     | (0, 2)              | 0     | (0, 7)                    | 0     | (0, 2)    |
| 495     | Poliovirus receptor                                   | P15151 | 45 kDa                   | 0.199 ± 0.47 | 0.14 ± 0.34   | 0     | (0, 2)              | 0     | (0, 6)                    | 0     | (0, 2)    |
| 496     | Polymeric immunoglobulin receptor                     | P01833 | 83 kDa                   | 897 ± 170    | 1050 ± 240    | 947   | (349, 1564)         | 55    | (49, 61)                  | 70.5  | (54, 101) |



|         |                                                   |        |         | Normalized Total Spectra |              | Total Spectra |           | % Sequence Coverage |          | Number of Unique Peptides |         |   |
|---------|---------------------------------------------------|--------|---------|--------------------------|--------------|---------------|-----------|---------------------|----------|---------------------------|---------|---|
| Protein | Accession                                         | MW     | non-GDM | GDM                      | Median       | Range         | Median    | Range               | Median   | Range                     | Rank    |   |
| 497     | POTE ankyrin domain family member E               | Q6S8J3 | 121 kDa | 7.03 ± 3.2               | 5.34 ± 3.6   | 6.5           | (1, 21)   | 4                   | (1, 7)   | 0                         | (0, 0)  |   |
| 498     | POTE ankyrin domain family member I               | P0CG38 | 121 kDa | 5.87 ± 2.9               | 4.76 ± 2.4   | 6             | (0, 18)   | 3                   | (0, 5)   | 0                         | (0, 1)  |   |
| 499     | POTE ankyrin domain family member J               | P0CG39 | 117 kDa | 0.255 ± 0.88             | 1.13 ± 2     | 3             | (0, 11)   | 2                   | (0, 3)   | 0                         | (0, 0)  |   |
| 500     | Pregnancy-specific beta-1-glycoprotein 1          | P11464 | 47 kDa  | 0.243 ± 0.38             | 0.2 ± 0.49   | 0             | (0, 1)    | 0                   | (0, 5)   | 0                         | (0, 1)  |   |
| 501     | Pre-miRNA 5'-monophosphate methyltransferase      | Q7Z5W3 | 33 kDa  | 0.0678 ± 0.23            | 0 ± 0        | 0             | (0, 2)    | 0                   | (0, 7)   | 0                         | (0, 2)  |   |
| 502     | Proactivator polypeptide                          | P07602 | 58 kDa  | 56.2 ± 30                | 47.2 ± 32    | 44.5          | (12, 114) | 42                  | (14, 60) | 20                        | (8, 33) |   |
| 503     | Probable ATP-dependent RNA helicase DDX46         | Q7L014 | 117 kDa | 0.261 ± 0.41             | 0.304 ± 0.74 | 0             | (0, 2)    | 0                   | (0, 2)   | 0                         | (0, 2)  |   |
| 504     | Procollagen-lysine,2-oxoglutarate 5-dioxygenase 1 | Q02809 | 84 kDa  | 0.241 ± 0.84             | 0 ± 0        | 0             | (0, 4)    | 0                   | (0, 4)   | 0                         | (0, 2)  |   |
| 505     | Pro-epidermal growth factor                       | P01133 | 134 kDa | 0.775 ± 0.68             | 1.18 ± 1.2   | 1             | (0, 4)    | 1                   | (0, 5)   | 1                         | (0, 3)  |   |
| 506     | Profilin-1                                        | P07737 | 15 kDa  | 2.59 ± 2.6               | 0.704 ± 1.2  | 1             | (0, 12)   | 11                  | (0, 46)  | 1                         | (0, 5)  |   |
| 507     | Prolactin-inducible protein                       | P12273 | 17 kDa  | 25 ± 8.9                 | 34.3 ± 10    | 26            | (4, 60)   | 58                  | (29, 66) | 8                         | (3, 14) |   |
| 508     | Prominin-1                                        | O43490 | 97 kDa  | 0.198 ± 0.49             | 0.742 ± 1.8  | 0             | (0, 6)    | 0                   | (0, 8)   | 0                         | (0, 5)  |   |
| 509     | Prostasin                                         | Q16651 | 36 kDa  | 4.59 ± 2                 | 7.95 ± 4.2   | 5             | (0, 21)   | 13                  | (0, 32)  | 3                         | (0, 8)  | 6 |
| 510     | Proteasome activator complex subunit 1            | Q06323 | 29 kDa  | 0.15 ± 0.41              | 0 ± 0        | 0             | (0, 2)    | 0                   | (0, 8)   | 0                         | (0, 2)  |   |
| 511     | Protein AHNAK2                                    | Q8IVF2 | 617 kDa | 0.0958 ± 0.24            | 0.207 ± 0.51 | 0             | (0, 2)    | 0                   | (0, 0)   | 0                         | (0, 2)  |   |
| 512     | Protein AMBP                                      | P02760 | 39 kDa  | 2.48 ± 1.9               | 1.85 ± 1.4   | 2             | (0, 10)   | 6                   | (0, 22)  | 2                         | (0, 4)  |   |

|         |                                    |        | Normalized Total Spectra |              | Total Spectra |       | % Sequence Coverage |       | Number of Unique Peptides |       |         |    |
|---------|------------------------------------|--------|--------------------------|--------------|---------------|-------|---------------------|-------|---------------------------|-------|---------|----|
| Protein | Accession                          | MW     | non-GDM                  | GDM          | Median        | Range | Median              | Range | Median                    | Range | Rank    |    |
| 513     | Protein CutA                       | O60888 | 19 kDa                   | 2.25 ± 1.3   | 1.62 ± 1.5    | 2     | (0, 6)              | 8     | (0, 23)                   | 1     | (0, 2)  |    |
| 514     | Protein disulfide-isomerase        | P07237 | 57 kDa                   | 1.36 ± 1.7   | 0.275 ± 0.51  | 0     | (0, 7)              | 0     | (0, 18)                   | 0     | (0, 6)  | 21 |
| 515     | Protein disulfide-isomerase A3     | P30101 | 57 kDa                   | 0.203 ± 0.39 | 0 ± 0         | 0     | (0, 2)              | 0     | (0, 5)                    | 0     | (0, 2)  |    |
| 516     | Protein DJ-1                       | Q99497 | 20 kDa                   | 1.08 ± 0.79  | 0.0965 ± 0.24 | 0     | (0, 3)              | 0     | (0, 12)                   | 0     | (0, 3)  | 3  |
| 517     | Protein FAM3B                      | P58499 | 26 kDa                   | 2.77 ± 1.6   | 0.876 ± 1.3   | 2     | (0, 6)              | 7     | (0, 29)                   | 2     | (0, 6)  | 5  |
| 518     | Protein OS-9                       | Q13438 | 76 kDa                   | 3.83 ± 2.6   | 0.938 ± 1.6   | 2     | (0, 10)             | 3     | (0, 14)                   | 2     | (0, 9)  |    |
| 519     | Protein S100-A1                    | P23297 | 11 kDa                   | 1.72 ± 1.4   | 0.635 ± 0.67  | 1     | (0, 4)              | 19    | (0, 38)                   | 1     | (0, 2)  |    |
| 520     | Protein S100-A11                   | P31949 | 12 kDa                   | 0.608 ± 0.73 | 1.61 ± 1.6    | 1     | (0, 7)              | 9     | (0, 28)                   | 1     | (0, 3)  |    |
| 521     | Protein S100-A12                   | P80511 | 11 kDa                   | 0.129 ± 0.34 | 0.461 ± 0.82  | 0     | (0, 3)              | 0     | (0, 10)                   | 0     | (0, 2)  |    |
| 522     | Protein S100-A4                    | P26447 | 12 kDa                   | 0.138 ± 0.48 | 0.063 ± 0.15  | 0     | (0, 2)              | 0     | (0, 17)                   | 0     | (0, 2)  |    |
| 523     | Protein S100-A6                    | P06703 | 10 kDa                   | 0.524 ± 0.86 | 1.17 ± 1      | 1     | (0, 4)              | 8     | (0, 24)                   | 0.5   | (0, 2)  |    |
| 524     | Protein S100-A8                    | P05109 | 11 kDa                   | 2.93 ± 3.7   | 6.03 ± 4.3    | 3     | (0, 18)             | 28    | (0, 67)                   | 3     | (0, 8)  |    |
| 525     | Protein S100-A9                    | P06702 | 13 kDa                   | 3.85 ± 3.6   | 12.4 ± 9.2    | 4     | (0, 36)             | 42    | (0, 90)                   | 3     | (0, 11) |    |
| 526     | Protein S100-P                     | P25815 | 10 kDa                   | 0.199 ± 0.36 | 0.615 ± 0.69  | 0     | (0, 2)              | 0     | (0, 24)                   | 0     | (0, 2)  |    |
| 527     | Prothrombin                        | P00734 | 70 kDa                   | 1.74 ± 1.6   | 0.656 ± 0.49  | 1     | (0, 6)              | 2     | (0, 12)                   | 1     | (0, 5)  |    |
| 528     | Putative beta-actin-like protein 3 | Q9BYX7 | 42 kDa                   | 1.89 ± 2     | 2.21 ± 1.9    | 3     | (0, 10)             | 7     | (0, 13)                   | 0     | (0, 0)  |    |

|         |                                                                              |        |         | Normalized Total Spectra |                   | Total Spectra |         | % Sequence Coverage |          | Number of Unique Peptides |        |  |
|---------|------------------------------------------------------------------------------|--------|---------|--------------------------|-------------------|---------------|---------|---------------------|----------|---------------------------|--------|--|
| Protein | Accession                                                                    | MW     | non-GDM | GDM                      | Median            | Range         | Median  | Range               | Median   | Range                     | Rank   |  |
| 529     | Putative heat shock protein HSP 90-beta 2                                    | Q58FF8 | 44 kDa  | $0.0705 \pm 0.24$        | $0 \pm 0$         | 0             | (0, 2)  | 0                   | (0, 6)   | 0                         | (0, 0) |  |
| 530     | Putative V-set and immunoglobulin domain-containing-like protein IGHV4OR15-8 | A6NJ16 | 14 kDa  | $0.49 \pm 0.5$           | $0.557 \pm 0.49$  | 0             | (0, 2)  | 0                   | (0, 12)  | 0                         | (0, 2) |  |
| 531     | Putative zinc-alpha-2-glycoprotein-like 1                                    | A8MT79 | 23 kDa  | $10.2 \pm 6.7$           | $17.6 \pm 4.9$    | 15            | (7, 30) | 23                  | (13, 30) | 0                         | (0, 1) |  |
| 532     | Rab GDP dissociation inhibitor beta                                          | P50395 | 51 kDa  | $0.149 \pm 0.52$         | $0 \pm 0$         | 0             | (0, 2)  | 0                   | (0, 4)   | 0                         | (0, 1) |  |
| 533     | Radixin                                                                      | P35241 | 69 kDa  | $0.336 \pm 0.6$          | $0 \pm 0$         | 0             | (0, 4)  | 0                   | (0, 7)   | 0                         | (0, 2) |  |
| 534     | Ras-related protein Rab-13                                                   | P51153 | 23 kDa  | $0.0474 \pm 0.16$        | $0 \pm 0$         | 0             | (0, 4)  | 0                   | (0, 10)  | 0                         | (0, 2) |  |
| 535     | Ras-related protein Rap-1b-like protein                                      | A6NIZ1 | 21 kDa  | $0.128 \pm 0.34$         | $0 \pm 0$         | 0             | (0, 2)  | 0                   | (0, 10)  | 0                         | (0, 1) |  |
| 536     | Reticulocalbin-1                                                             | Q15293 | 39 kDa  | $0.148 \pm 0.28$         | $0 \pm 0$         | 0             | (0, 4)  | 0                   | (0, 10)  | 0                         | (0, 2) |  |
| 537     | Retinol-binding protein 4                                                    | P02753 | 23 kDa  | $0.17 \pm 0.35$          | $0.568 \pm 1$     | 0             | (0, 4)  | 0                   | (0, 14)  | 0                         | (0, 3) |  |
| 538     | Ribonuclease pancreatic                                                      | P07998 | 18 kDa  | $1.12 \pm 0.77$          | $1.02 \pm 0.89$   | 1             | (0, 4)  | 4                   | (0, 26)  | 1                         | (0, 3) |  |
| 539     | Ribonuclease T2                                                              | O00584 | 29 kDa  | $3.32 \pm 2.2$           | $3.57 \pm 2.6$    | 3             | (0, 10) | 12                  | (0, 30)  | 3                         | (0, 7) |  |
| 540     | RNA polymerase II-associated protein 1                                       | Q9BWH6 | 153 kDa | $0.0648 \pm 0.22$        | $0.0849 \pm 0.21$ | 0             | (0, 2)  | 0                   | (0, 1)   | 0                         | (0, 2) |  |
| 541     | Sclerostin domain-containing protein 1                                       | Q6X4U4 | 23 kDa  | $1.58 \pm 1.8$           | $0.381 \pm 0.68$  | 1             | (0, 6)  | 0                   | (0, 21)  | 1                         | (0, 4) |  |
| 542     | Secreted frizzled-related protein 1                                          | Q8N474 | 35 kDa  | $0.4 \pm 0.6$            | $0.858 \pm 0.84$  | 0             | (0, 4)  | 0                   | (0, 8)   | 0                         | (0, 2) |  |
| 543     | Secretoglobin family 1D member 2                                             | O95969 | 10 kDa  | $0.316 \pm 0.5$          | $2.41 \pm 3.4$    | 0             | (0, 12) | 0                   | (0, 32)  | 0                         | (0, 3) |  |
| 544     | Secretoglobin family 3A member 1                                             | Q96QR1 | 10 kDa  | $0.235 \pm 0.46$         | $0.879 \pm 1.4$   | 0             | (0, 5)  | 0                   | (0, 62)  | 0                         | (0, 2) |  |

|         |                                                      |        |         | Normalized Total Spectra |              | Total Spectra |           | % Sequence Coverage |          | Number of Unique Peptides |          |   |
|---------|------------------------------------------------------|--------|---------|--------------------------|--------------|---------------|-----------|---------------------|----------|---------------------------|----------|---|
| Protein | Accession                                            | MW     | non-GDM | GDM                      | Median       | Range         | Median    | Range               | Median   | Range                     | Rank     |   |
| 545     | Selenium-binding protein 1                           | Q13228 | 52 kDa  | 2.4 ± 1.9                | 0.783 ± 0.76 | 1             | (0, 8)    | 2                   | (0, 14)  | 1                         | (0, 6)   |   |
| 546     | Selenoprotein P                                      | P49908 | 43 kDa  | 4.46 ± 2.2               | 2.07 ± 1.8   | 3.5           | (0, 9)    | 5                   | (0, 15)  | 2                         | (0, 6)   | 9 |
| 547     | Serotransferrin                                      | P02787 | 77 kDa  | 82.5 ± 18                | 105 ± 42     | 83            | (35, 232) | 50                  | (33, 69) | 30                        | (20, 59) |   |
| 548     | Serum amyloid A-1 protein                            | P0DJ18 | 14 kDa  | 0.365 ± 0.61             | 0.193 ± 0.47 | 0             | (0, 2)    | 0                   | (0, 21)  | 0                         | (0, 2)   |   |
| 549     | SH3 domain-binding glutamic acid-rich-like protein 3 | Q9H299 | 10 kDa  | 0.52 ± 0.56              | 0.261 ± 0.48 | 0             | (0, 2)    | 0                   | (0, 27)  | 0                         | (0, 2)   |   |
| 550     | Signal-regulatory protein beta-1 isoform 3           | Q5TFQ8 | 43 kDa  | 0 ± 0                    | 0.336 ± 0.82 | 0             | (0, 4)    | 0                   | (0, 10)  | 0                         | (0, 0)   |   |
| 551     | Soluble calcium-activated nucleotidase 1             | Q8WVQ1 | 45 kDa  | 0.242 ± 0.5              | 0.281 ± 0.34 | 0             | (0, 3)    | 0                   | (0, 6)   | 0                         | (0, 3)   |   |
| 552     | SPARC-like protein 1                                 | Q14515 | 75 kDa  | 10.1 ± 11                | 5.21 ± 4.7   | 5             | (0, 36)   | 8                   | (0, 35)  | 4                         | (0, 20)  |   |
| 553     | Sulfhydryl oxidase 1                                 | O00391 | 83 kDa  | 6.45 ± 5.1               | 3.11 ± 3.7   | 5             | (0, 22)   | 9                   | (0, 25)  | 4                         | (0, 13)  |   |
| 554     | Suppressor of tumorigenicity 14 protein              | Q9Y5Y6 | 95 kDa  | 0.956 ± 1.3              | 0.711 ± 0.81 | 1             | (0, 3)    | 1                   | (0, 4)   | 1                         | (0, 2)   |   |
| 555     | Suprabasin                                           | Q6UWP8 | 61 kDa  | 0.989 ± 1                | 0.938 ± 0.84 | 1             | (0, 4)    | 3                   | (0, 8)   | 1                         | (0, 3)   |   |
| 556     | Synaptosomal-associated protein 23                   | O00161 | 23 kDa  | 0.828 ± 1.2              | 0 ± 0        | 0             | (0, 4)    | 0                   | (0, 21)  | 0                         | (0, 4)   |   |
| 557     | Syndecan-2                                           | P34741 | 22 kDa  | 0.524 ± 0.96             | 0 ± 0        | 0             | (0, 4)    | 0                   | (0, 7)   | 0                         | (0, 3)   |   |
| 558     | Syntaxin-3                                           | Q13277 | 33 kDa  | 0.224 ± 0.48             | 0 ± 0        | 0             | (0, 3)    | 0                   | (0, 10)  | 0                         | (0, 3)   |   |
| 559     | Syntenin-1                                           | O00560 | 32 kDa  | 2.01 ± 1.6               | 1.7 ± 1.1    | 2             | (0, 8)    | 3                   | (0, 28)  | 1                         | (0, 5)   |   |
| 560     | Targeting protein for Xk1p2                          | Q9ULW0 | 86 kDa  | 0.202 ± 0.51             | 0.553 ± 0.49 | 0             | (0, 2)    | 0                   | (0, 3)   | 0                         | (0, 2)   |   |

|         |                                                 |        |          | Normalized Total Spectra |               | Total Spectra |            | % Sequence Coverage |          | Number of Unique Peptides |           |    |
|---------|-------------------------------------------------|--------|----------|--------------------------|---------------|---------------|------------|---------------------|----------|---------------------------|-----------|----|
| Protein | Accession                                       | MW     | non-GDM  | GDM                      | Median        | Range         | Median     | Range               | Median   | Range                     | Rank      |    |
| 561     | Tenascin                                        | P24821 | 241 kDa  | 352 ± 87                 | 427 ± 96      | 336.5         | (104, 720) | 52                  | (29, 60) | 98                        | (53, 160) | 16 |
| 562     | Tetraspanin-6                                   | O43657 | 28 kDa   | 0.456 ± 0.61             | 0.251 ± 0.39  | 0             | (0, 2)     | 0                   | (0, 9)   | 0                         | (0, 2)    |    |
| 563     | Thioredoxin                                     | P10599 | 12 kDa   | 2.65 ± 1.6               | 1.93 ± 0.99   | 2             | (0, 5)     | 21                  | (0, 40)  | 2                         | (0, 4)    |    |
| 564     | Thrombospondin-1                                | P07996 | 129 kDa  | 18.2 ± 9.3               | 33.9 ± 15     | 19.5          | (0, 63)    | 17                  | (0, 39)  | 13.5                      | (0, 27)   |    |
| 565     | Thrombospondin-2                                | P35442 | 130 kDa  | 0.853 ± 1.2              | 0.877 ± 0.94  | 1             | (0, 4)     | 1                   | (0, 2)   | 0                         | (0, 1)    |    |
| 566     | Thrombospondin-3                                | P49746 | 104 kDa  | 0.0956 ± 0.33            | 0 ± 0         | 0             | (0, 2)     | 0                   | (0, 2)   | 0                         | (0, 1)    |    |
| 567     | Titin                                           | Q8WZ42 | 3816 kDa | 1.04 ± 1.5               | 3.7 ± 3.6     | 5             | (0, 9)     | 0                   | (0, 0)   | 1                         | (0, 3)    |    |
| 568     | Transcobalamin-1                                | P20061 | 48 kDa   | 1.12 ± 1.7               | 3 ± 4.8       | 0             | (0, 11)    | 0                   | (0, 23)  | 0                         | (0, 8)    |    |
| 569     | Transforming growth factor beta receptor type 3 | Q03167 | 94 kDa   | 0 ± 0                    | 0.0677 ± 0.17 | 0             | (0, 1)     | 0                   | (0, 4)   | 0                         | (0, 1)    |    |
| 570     | Trans-Golgi network integral membrane protein 2 | O43493 | 51 kDa   | 0.487 ± 0.82             | 0.309 ± 0.53  | 0             | (0, 3)     | 0                   | (0, 6)   | 0                         | (0, 2)    |    |
| 571     | Transketolase                                   | P29401 | 68 kDa   | 0.174 ± 0.6              | 0 ± 0         | 0             | (0, 3)     | 0                   | (0, 5)   | 0                         | (0, 2)    |    |
| 572     | Translationally-controlled tumor protein        | P13693 | 20 kDa   | 0.669 ± 1                | 0.2 ± 0.34    | 0             | (0, 3)     | 0                   | (0, 15)  | 0                         | (0, 3)    |    |
| 573     | Transmembrane protein 132A                      | Q24JP5 | 110 kDa  | 0.38 ± 0.59              | 0.208 ± 0.35  | 0             | (0, 3)     | 0                   | (0, 5)   | 0                         | (0, 2)    |    |
| 574     | Transmembrane protein 201                       | Q5SNT2 | 72 kDa   | 0.758 ± 0.66             | 1.27 ± 1.2    | 1             | (0, 4)     | 1                   | (0, 8)   | 1                         | (0, 3)    | 20 |
| 575     | Transthyretin                                   | P02766 | 16 kDa   | 17.1 ± 4.1               | 11.2 ± 3.3    | 15.5          | (6, 28)    | 42                  | (18, 50) | 7                         | (3, 12)   | 12 |
| 576     | Trefoil factor 1                                | P04155 | 9 kDa    | 0 ± 0                    | 1.03 ± 1.4    | 0             | (0, 4)     | 0                   | (0, 44)  | 0                         | (0, 3)    |    |

|         |                                                       |        | Normalized Total Spectra |               | Total Spectra |       | % Sequence Coverage |       | Number of Unique Peptides |       |         |    |
|---------|-------------------------------------------------------|--------|--------------------------|---------------|---------------|-------|---------------------|-------|---------------------------|-------|---------|----|
| Protein | Accession                                             | MW     | non-GDM                  | GDM           | Median        | Range | Median              | Range | Median                    | Range | Rank    |    |
| 577     | Trefoil factor 3                                      | Q07654 | 9 kDa                    | 0.14 ± 0.48   | 1.1 ± 1.4     | 0     | (0, 4)              | 0     | (0, 50)                   | 0     | (0, 3)  |    |
| 578     | Triosephosphate isomerase                             | P60174 | 31 kDa                   | 2.77 ± 2.3    | 1.06 ± 0.8    | 1.5   | (0, 10)             | 5     | (0, 39)                   | 1     | (0, 8)  | 26 |
| 579     | Tropomyosin alpha-3 chain                             | P06753 | 33 kDa                   | 1.04 ± 1.2    | 0.634 ± 1.1   | 0.5   | (0, 5)              | 2     | (0, 11)                   | 0     | (0, 1)  |    |
| 580     | Tropomyosin beta chain                                | P07951 | 33 kDa                   | 0.147 ± 0.28  | 0.248 ± 0.61  | 0     | (0, 2)              | 0     | (0, 6)                    | 0     | (0, 0)  |    |
| 581     | Trypsin-1                                             | P07477 | 27 kDa                   | 3.07 ± 2.9    | 2.17 ± 2.2    | 2.5   | (0, 7)              | 8     | (0, 8)                    | 2     | (0, 4)  |    |
| 582     | Tubulointerstitial nephritis antigen-like             | Q9GZM7 | 52 kDa                   | 0.133 ± 0.31  | 0.265 ± 0.49  | 0     | (0, 2)              | 0     | (0, 5)                    | 0     | (0, 2)  |    |
| 583     | Tumor necrosis factor ligand superfamily member 13    | O75888 | 27 kDa                   | 0.6 ± 0.54    | 0.265 ± 0.33  | 0     | (0, 3)              | 0     | (0, 8)                    | 0     | (0, 2)  |    |
| 584     | Tumor necrosis factor receptor superfamily member 11B | O00300 | 46 kDa                   | 1.82 ± 2.2    | 0.43 ± 0.67   | 0     | (0, 8)              | 0     | (0, 26)                   | 0     | (0, 7)  |    |
| 585     | Ubiquitin-40S ribosomal protein S27a                  | P62979 | 18 kDa                   | 7.59 ± 6.1    | 3.68 ± 2.6    | 7     | (0, 22)             | 12    | (0, 28)                   | 0     | (0, 0)  |    |
| 586     | Uncharacterized protein KIAA1958                      | Q8N8K9 | 79 kDa                   | 0.206 ± 0.4   | 0.0672 ± 0.16 | 0     | (0, 2)              | 0     | (0, 2)                    | 0     | (0, 2)  |    |
| 587     | UPF0415 protein C7orf25                               | Q9BPX7 | 46 kDa                   | 4.39 ± 2.8    | 5.3 ± 2.8     | 5     | (0, 12)             | 2     | (0, 3)                    | 1     | (0, 3)  |    |
| 588     | Vascular cell adhesion protein 1                      | P19320 | 81 kDa                   | 0.269 ± 0.79  | 0 ± 0         | 0     | (0, 5)              | 0     | (0, 7)                    | 0     | (0, 5)  |    |
| 589     | VEGF co-regulated chemokine 1                         | Q6UXB2 | 14 kDa                   | 0.205 ± 0.55  | 0.193 ± 0.47  | 0     | (0, 3)              | 0     | (0, 17)                   | 0     | (0, 2)  |    |
| 590     | Vimentin                                              | P08670 | 54 kDa                   | 0.0678 ± 0.23 | 0.928 ± 2.3   | 0     | (0, 9)              | 0     | (0, 17)                   | 0     | (0, 7)  |    |
| 591     | Vitamin D-binding protein                             | P02774 | 53 kDa                   | 15.3 ± 6.5    | 19.5 ± 11     | 13.5  | (2, 42)             | 28    | (3, 53)                   | 11    | (2, 21) |    |
| 592     | Vitronectin                                           | P04004 | 54 kDa                   | 10.3 ± 5.2    | 8.81 ± 4.1    | 8.5   | (2, 25)             | 14    | (1, 29)                   | 6     | (1, 11) |    |

|         |                                                           |        | Normalized Total Spectra |               | Total Spectra |       | % Sequence Coverage |       | Number of Unique Peptides |       |          |
|---------|-----------------------------------------------------------|--------|--------------------------|---------------|---------------|-------|---------------------|-------|---------------------------|-------|----------|
| Protein | Accession                                                 | MW     | non-GDM                  | GDM           | Median        | Range | Median              | Range | Median                    | Range | Rank     |
| 593     | Voltage-dependent L-type calcium channel subunit alpha-1F | O60840 | 221 kDa                  | 1.97 ± 3.1    | 0.446 ± 0.46  | 0     | (0, 13)             | 0     | (0, 1)                    | 0     | (0, 2)   |
| 594     | von Willebrand factor A domain-containing protein 1       | Q6PCB0 | 47 kDa                   | 4.39 ± 3      | 2.95 ± 2.5    | 3.5   | (0, 14)             | 7     | (0, 27)                   | 3     | (0, 8)   |
| 595     | V-type proton ATPase subunit S1                           | Q15904 | 52 kDa                   | 0.257 ± 0.33  | 0.0684 ± 0.17 | 0     | (0, 2)              | 0     | (0, 6)                    | 0     | (0, 2)   |
| 596     | WAP four-disulfide core domain protein 2                  | Q14508 | 13 kDa                   | 0.0663 ± 0.15 | 1.22 ± 1.6    | 0     | (0, 5)              | 0     | (0, 31)                   | 0     | (0, 2)   |
| 597     | Xanthine dehydrogenase/oxidase                            | P47989 | 146 kDa                  | 46.4 ± 32     | 18.1 ± 27     | 35    | (0, 108)            | 21    | (0, 42)                   | 23    | (0, 47)  |
| 598     | Zinc finger protein 318                                   | Q5VUA4 | 251 kDa                  | 0.187 ± 0.31  | 0.252 ± 0.45  | 0     | (0, 3)              | 0     | (0, 1)                    | 0     | (0, 2)   |
| 599     | Zinc finger protein 518A                                  | Q6AHZ1 | 167 kDa                  | 0 ± 0         | 0.17 ± 0.42   | 0     | (0, 2)              | 0     | (0, 1)                    | 0     | (0, 2)   |
| 600     | Zinc-alpha-2-glycoprotein                                 | P25311 | 34 kDa                   | 83.2 ± 20     | 109 ± 26      | 79.5  | (41, 194)           | 60    | (48, 71)                  | 16    | (11, 27) |
| 601     | Zymogen granule protein 16 homolog B                      | Q96DA0 | 23 kDa                   | 1.33 ± 1.4    | 1.76 ± 1.5    | 1     | (0, 7)              | 4     | (0, 22)                   | 1     | (0, 5)   |

**Supplemental Table 2.** Validation of orthogonal signal corrected partial least squares discriminant analysis model and selected proteins

|                                   | $Q^2$ <sup>a</sup>           | AUC <sup>b</sup>            | Sensitivity <sup>c</sup>    | Specificity <sup>d</sup>    |
|-----------------------------------|------------------------------|-----------------------------|-----------------------------|-----------------------------|
| Selected model (27) <sup>e</sup>  | 0.770 ± 0.063 <sup>f,g</sup> | 0.791 ± 0.14 <sup>f,g</sup> | 0.723 ± 0.24 <sup>f,g</sup> | 0.860 ± 0.23 <sup>f,g</sup> |
| Permuted model (27) <sup>h</sup>  | 0.060 ± 0.65                 | 0.475 ± 0.21                | 0.449 ± 0.24                | 0.500 ± 0.34                |
| Excluded model (233) <sup>i</sup> | 0.076 ± 0.42 <sup>f,g</sup>  | 0.370 ± 0.19 <sup>f,g</sup> | 0.425 ± 0.22 <sup>f,g</sup> | 0.315 ± 0.29 <sup>f,g</sup> |
| Permuted model (233) <sup>h</sup> | 0.302 ± 0.27                 | 0.508 ± 0.23                | 0.513 ± 0.26                | 0.504 ± 0.37                |

<sup>a</sup> Cross-validated model fit, mean ± stdev.

<sup>b</sup> Area under the receiver operator characteristic curve, mean ± stdev.

<sup>c</sup> True positive or recall rate, mean ± stdev.

<sup>d</sup> True negative rate, mean ± stdev.

<sup>e</sup> Model including only the selected features (number of proteins).

<sup>f</sup> Differences between the selected and permuted (null distribution) models, P < 0.05.

<sup>g</sup> Differences between the selected and excluded models, P < 0.05.

<sup>h</sup> Model based on permuted class labels (number of proteins).

<sup>i</sup> Model excluding the selected features (number of proteins).
